# 1 COCOA: Coordinate covariation analysis of epigenetic heterogeneity

2 John T. Lawson<sup>1,2</sup>, Jason P. Smith<sup>2,3</sup>, Stefan Bekiranov<sup>2,3</sup>, Francine E. Garrett-Bakelman<sup>3-5</sup>, and Nathan C. Sheffield<sup>1-3\*</sup>

3 <sup>1</sup>Department of Biomedical Engineering, University of Virginia, Charlottesville, VA, USA

4 <sup>2</sup>Center for Public Health Genomics, University of Virginia, Charlottesville, VA, USA

5 <sup>3</sup>Department of Biochemistry and Molecular Genetics, University of Virginia, Charlottesville, VA, USA

6 <sup>4</sup>Department of Medicine, University of Virginia, Charlottesville, VA, USA

7 <sup>5</sup>University of Virginia Cancer Center

8 \*Contact: [nsheffield@virginia.edu](mailto:nsheffield@virginia.edu)

9

## 10 Abstract

---

11 A key challenge in epigenetics is to determine the biological significance of epigenetic variation among  
12 individuals. Here, we present Coordinate Covariation Analysis (COCO), a computational framework that  
13 uses covariation of epigenetic signals across individuals and a database of region sets to annotate  
14 epigenetic heterogeneity. COCO is the first such tool for DNA methylation data and can also analyze  
15 any epigenetic signal with genomic coordinates. We demonstrate COCO's utility by analyzing DNA  
16 methylation, ATAC-seq, and multi-omic data in supervised and unsupervised analyses, showing that  
17 COCO provides new understanding of inter-sample epigenetic variation. COCO is available as a  
18 Bioconductor R package (<http://bioconductor.org/packages/COCO>).

19 Keywords: epigenetics; DNA methylation; chromatin accessibility; principal component analysis;  
20 dimensionality reduction; data integration; cancer; EZH2; multi-omics

## 21 Introduction

---

22 Epigenetic data is inherently high-dimensional and often difficult to interpret. Because of the high  
23 dimensionality, it is common to group individual genomic loci into collections that share a functional  
24 annotation, such as binding of a particular transcription factor<sup>[1-3]</sup>. These genomic locus collections, or  
25 region sets, are analogous to the more common gene sets, but relax the constraint that data must be  
26 gene-centric. While gene set approaches may be applied to epigenetic data by linking regions to nearby  
27 genes<sup>[4]</sup>, this linking process is ambiguous and loses information because a regulatory locus may affect  
28 the expression of multiple genes or more distant genes. Alternatively, a region-centric approach is often  
29 more appropriate for epigenetic data, and there are now many region-based databases and analytical  
30 approaches<sup>[1, 2, 5-7]</sup>, such as using region set databases for enrichment analysis<sup>[1, 7, 8]</sup> or to aggregate

31 epigenetic signals from individual samples across regions to assign scores of regulatory activity to  
32 individual samples or single cells<sup>[2, 3, 6, 9]</sup>.

33 Region-based methods have provided complementary ways to annotate and understand epigenomic  
34 data, but they suffer from three drawbacks: First, it is common to ignore covariation between the  
35 epigenetic signal and continuous patient phenotypes, relying instead on differential signals between  
36 discrete sample groups. This approach loses information about the differences among samples within a  
37 group. Second, the use of discrete cutoffs for identifying significant epigenetic differences between  
38 samples loses information about the strength of covariation between epigenetic features and sample  
39 phenotype. Third, existing approaches are generally specific to certain scenarios (e.g. unsupervised  
40 analysis) or data types (e.g. ATAC-seq), and therefore do not provide a generally applicable framework  
41 for covariation-based analysis.

42 Here, we present Coordinate Covariation Analysis (COCOA), a method for annotating epigenetic  
43 variation across individuals using region sets. COCOA offers several advantages compared to existing  
44 methods: First, COCOA provides a flexible framework that supports both supervised and unsupervised  
45 analysis. Second, for supervised analysis, COCOA leverages covariation information by allowing  
46 continuous sample phenotypes as well as discrete groups. Third, COCOA incorporates epigenetic signal  
47 values instead of using binarized values (i.e. significant or not significant), further taking advantage of  
48 the covariation information. Finally, COCOA works with any epigenetic data that have a numerical value  
49 associated with genomic coordinates, such as DNA methylation data, chromatin accessibility data, or  
50 even multi-omics data. Importantly, no such tool that leverages covariation of epigenetic signal across  
51 samples to annotate epigenetic variation previously existed for DNA methylation data. To demonstrate  
52 COCOA's utility, we applied it in three unsupervised analyses with DNA methylation, ATAC-seq, and  
53 multi-omics data, and a supervised analysis of DNA methylation and cancer stage. We found that across  
54 multiple data types and biological systems, COCOA is able to identify promising biological sources of  
55 epigenetic heterogeneity across sample populations.

56

57

58

## 59 **Results and Discussion**

---

### 60 **An overview of COCOA**

61 COCOA is an approach to understanding epigenetic variation among samples. COCOA derives its  
62 annotation power from a database of region sets that are grouped by function. This choice is rooted in  
63 the observation that a single effector, such as a transcription factor, often regulates many regions across  
64 the genome. Because the regions are coregulated, their epigenetic signal may covary across samples  
65 according to the activity of the effector (Fig. 1A), which can then be used to infer activity of the effector  
66 (Fig. 1B). This principle of covariation of coregulated loci or genes has been leveraged by other methods  
67 related to gene regulation<sup>[2, 3, 9-13]</sup>. To distinguish small differences among samples in the activity level of  
68 the effector, COCOA boosts statistical power by aggregating signal in region sets<sup>[3]</sup>.

69 COCOA uses this aggregated region set approach to annotate the underlying source of epigenetic  
70 variation that relates to a “target variable,” which can be either a supervised variable, like the  
71 phenotype of interest (Fig. 1C), or an unsupervised variable, like the primary latent factors in the data  
72 (Fig. 1D). COCOA annotates the inter-sample variation in the target variable by identifying region sets  
73 with variation patterns in epigenetic data that match the variation in the target variable. After a target  
74 variable is chosen, COCOA analysis consists of two main steps: first, for each locus, it computes the  
75 association of the inter-sample epigenetic variation with the target variable (Fig. 1E) and, second, it uses  
76 those associations to score a database of region sets (Fig. 1F). COCOA uses a permutation test to  
77 evaluate the statistical significance of each region set score. The result is a list of region sets ranked by  
78 how well the epigenetic signals in the region set correlate with the target variable. Highly scoring region  
79 sets have epigenetic signal that covaries across patients in the same way as the target variable, tying the  
80 functional annotation of the region set to the observed phenotypic variation.

81

82

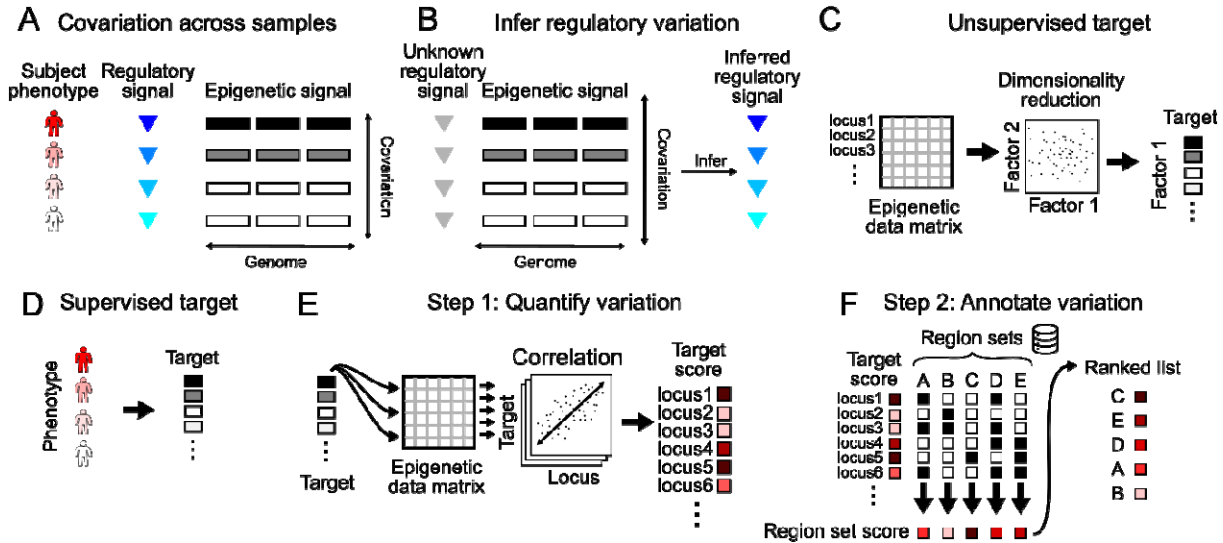

83

84 **Figure 1. Overview of COCOA.** A. A regulatory signal may covary with the epigenetic signal in the genomic regions it regulates. B. Covariation of  
 85 the epigenetic signal in coregulated regions across individuals can be used to infer variation in the regulatory signal. C. COCOA can be used with  
 86 an unsupervised target variable (latent factor), or D. with a supervised target variable (phenotype). E. The first step is to quantify the  
 87 relationship between the target variable and the epigenetic data at each locus, resulting in a score for each locus. F. The second step is to  
 88 annotate variation using a database of region sets. Each region set is scored to identify the region sets most associated with covariation  
 89 between the epigenetic signal and the target variable. These top region sets can yield insight into the biological significance of the epigenetic  
 90 variation.

## 91 COCOA annotates inter-sample variation in breast cancer DNA methylation data

92 We first evaluated COCOA in an unsupervised analysis to determine if COCOA could identify and  
 93 annotate a driving source of variation. We applied COCOA to DNA methylation data from breast cancer  
 94 patients in The Cancer Genome Atlas (TCGA). In breast cancer, estrogen receptor (ER) status is a major  
 95 prognostic factor and is known to be associated with a specific DNA methylation profile<sup>[14, 15]</sup>. We first  
 96 used Principle Component Analysis to identify the top four Principal Components (PCs), which we used  
 97 as the target variables, and asked whether COCOA would be able to identify ER as an important source  
 98 of inter-sample variation using only the DNA methylation data, without requiring the samples' ER status.

99 COCOA identified a strong ER-associated signature for Principal Component 1 (PC1). This signature  
 100 included many ER-binding region sets as top hits, indicating that variation of the DNA methylation in  
 101 these ER-binding regions is associated with PC1 (Fig. 2A, Additional file 1: Table S1). We also identified  
 102 variation in region sets for FOXA1 and GATA3, which are known to be associated with ER status<sup>[14, 15]</sup>  
 103 (Additional file 1: Table S1). Furthermore, COCOA found the ER-associated histone modification  
 104 H3R17me2 among the top scoring region sets<sup>[16]</sup> (Additional file 1: Table S1). When we test the

105 association of each PC with ER status, PC1 scores have a highly significant association with ER status ( $p <$   
106  $10^{-46}$ , Wilcoxon rank-sum test), whereas PC2 and PC3 are less associated (Fig. 2B). Therefore, COCOA  
107 clearly identified ER-related variation as relevant for the primary axis of inter-sample variation, despite  
108 not having access to ER status information. We found that PC4 was also associated with ER status to a  
109 lesser extent ( $p < 10^{-20}$ ). For PC4, COCOA identified regions with repressive chromatin marks, including  
110 binding sites for polycomb components EZH2 and SUZ12 and repressive histone modifications  
111 H3K27me3 and H3K9me3 (Fig. 2A, Fig. S1). Previous studies have linked polycomb expression to breast  
112 cancer: higher EZH2 expression is associated with ER- breast cancer<sup>[17, 18]</sup>, EZH2 interacts with the  
113 repressor of estrogen activity (REA) protein<sup>[19]</sup>, and Suz12 binding sites have DNA methylation  
114 differences between ER+ and ER- breast cancer<sup>[14]</sup>. Therefore, PC4 represents an additional aspect of ER-  
115 related epigenetic variation. PC2 and PC3 had weaker associations with ER status ( $p < 0.01$  and  $p < 10^{-4}$   
116 respectively); for PC3, the highest-ranking PC3 region sets include some ER-related region sets along  
117 with hematopoietic region sets (Additional file 1: Table S1). The hematopoietic region sets may  
118 represent inter-sample variation in the immune component of the tumors since breast cancer subtypes  
119 have been reported to be associated with differing immune cell profiles<sup>[20]</sup>. In summary, these results  
120 demonstrate that COCOA was able to identify relevant sources of inter-sample variation without  
121 requiring known sample groups and therefore reveal COCOA's usefulness for unsupervised analysis of  
122 DNA methylation data.

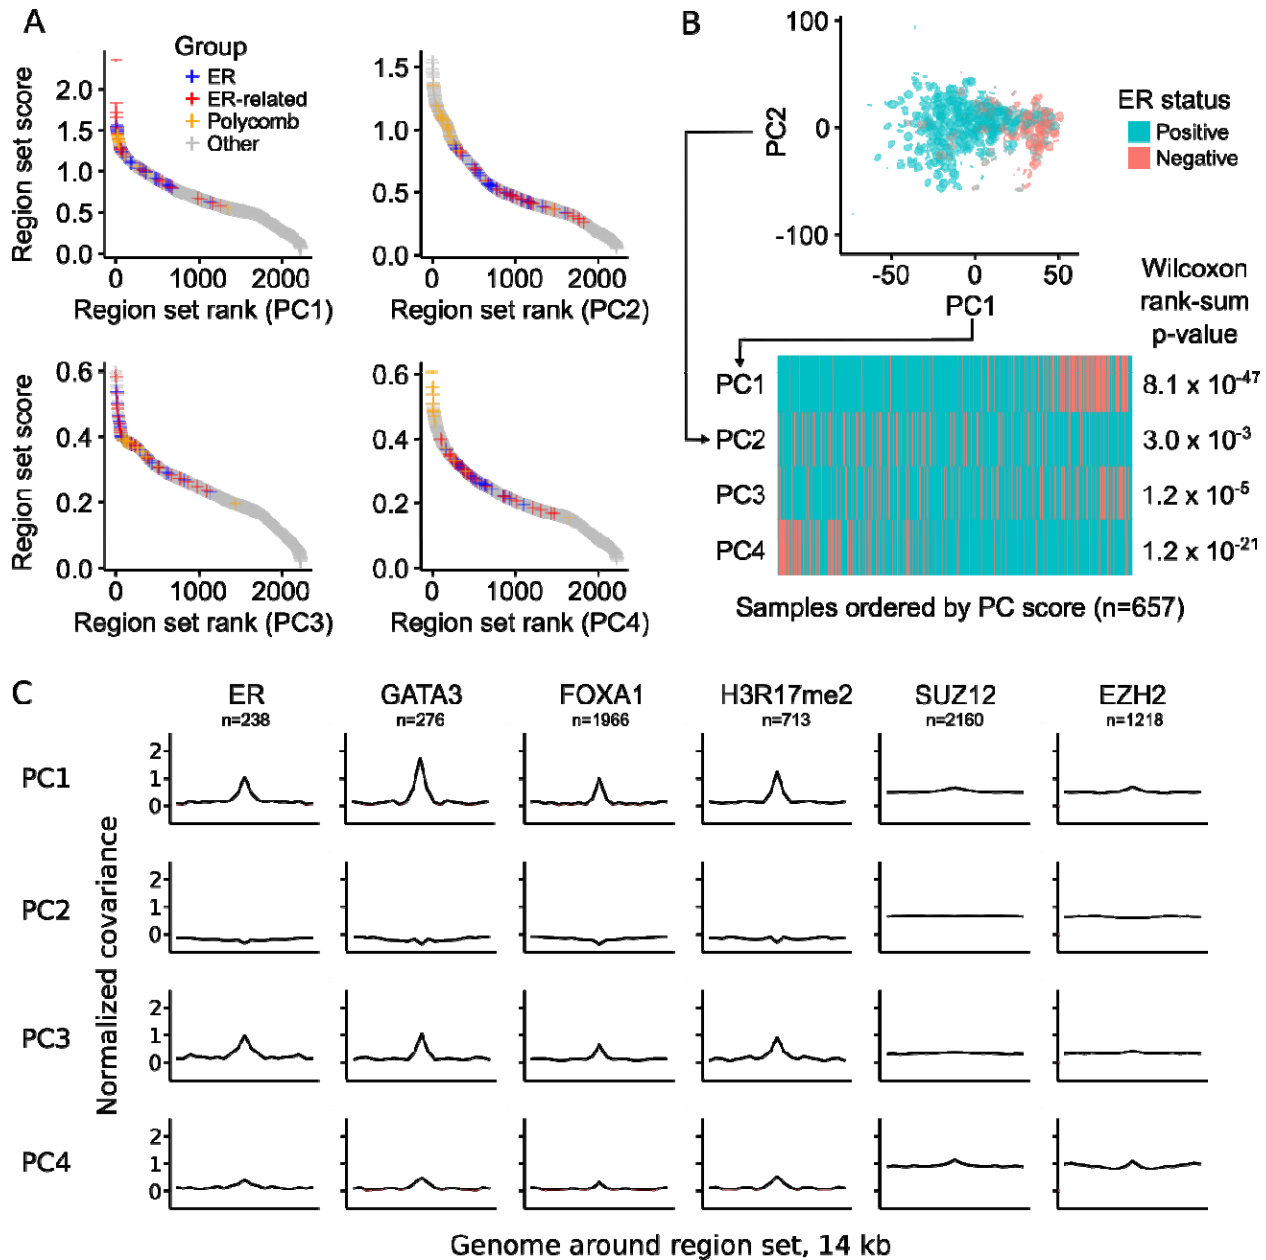

123

124 **Figure 2. COCOA identifies sources of DNA methylation regulatory variation.** A. The COCOA score for each region set, ordered from highest to  
 125 lowest. The ER-related group includes GATA3, FOXA1, and H3R17me2. The polycomb group includes EZH2 and SUZ12. B. The association of PC  
 126 scores with ER status for PCs 1-4 based on a Wilcoxon rank-sum test. C. Meta-region profiles of several of the highest scoring region sets from  
 127 PC1 (GATA3, ER, H3R17me2) and two polycomb group proteins (EZH2, SUZ12). Meta-region profiles show covariance between PC scores and  
 128 the epigenetic signal in regions of the region set, centered on the regions of interest. A peak in the center indicates that DNA methylation in  
 129 those regions covaries with the PC specifically around the sites of interest. The number of regions from each region set that were covered by  
 130 the epigenetic data in the COCOA analysis (panel A) is indicated by “n”.

131 To visualize the inter-sample variation that drives the top region sets identified by COCOA, COCOA can  
 132 also plot DNA methylation in a region set, ordered by PC value (Fig. S2). Using this approach, we

133 visualized how the DNA methylation in ER-related regions varies along PC1, demonstrating clear  
134 covariation across regions that drives the region set rankings (Fig. S2). To further confirm the specificity  
135 of the region sets, COCOA can also plot variation in broader genomic regions around the regions of  
136 interest. We found that the DNA methylation close to the transcription factor binding regions shows  
137 stronger covariation with the PC score than DNA methylation in the surrounding genome (Fig. 2C). This  
138 visualization of specificity of the covariation to the binding regions provides additional evidence of  
139 association between the PC and region set. Other high-ranking transcription factors also showed this  
140 specificity (Fig. 2C, Fig. S3). Some histone modifications, such as H3K9me3 and H3K27me3, where DNA  
141 methylation levels had high covariation with the PC showed broader regions of elevated covariation (Fig.  
142 S3). Overall, these visualization functions reveal aspects of epigenetic variation in the top region sets  
143 that could not be captured by a single region set score.

#### 144 **COCOA annotates regulatory variation in ATAC-seq data**

145 Next, we asked whether COCOA could be applied to ATAC-seq data. Unlike DNA methylation data, which  
146 annotates individual nucleotides, ATAC-seq data is summarized by accessibility values at “peak” regions  
147 <sup>[21]</sup>. COCOA handles either data type. To demonstrate the region-type analysis, we ran COCOA with  
148 ATAC-seq data from TCGA breast cancer patients<sup>[21]</sup>, expecting that ER-related region sets would be  
149 among our top results, similar to the DNA methylation data. As before, we used PCA on the ATAC-seq  
150 data and then applied COCOA to annotate the sources of variation for each PC. We identified many of  
151 the same region sets to be associated with epigenetic variation, despite far fewer samples (657 vs 73).  
152 We found ER-related region sets to be among the top ranked results for PC1 (Fig. 3A, Additional file 1:  
153 Table S2). PC2 was characterized by high-ranking hematopoietic transcription factors (Fig. 3A, Additional  
154 file 1: Table S2), once again potentially representing inter-sample variation in the immune component of  
155 the tumors<sup>[20]</sup>, as in PC3 of the DNA methylation data. A few other top PCs including PC4 also had high-  
156 ranking hematopoietic transcription factors (Fig. 3A, Fig. S4). Consistent with our results, visual  
157 inspection of the chromatin accessibility signal in top ER-related and hematopoietic region sets also  
158 revealed correlation between the signal and PC scores for the PCs in which the region sets were highly  
159 ranked (Fig. S5). Polycomb region sets did not rank as prominently for the ATAC-seq data as for the DNA  
160 methylation data but there were several polycomb region sets in the top 10% of region set scores for  
161 PC4 (Fig. S6, Additional file 1: Table S2). These results are consistent with variation in ER status, which is  
162 significantly associated with PC1 and PC2 ( $p < 0.01$ , Wilcoxon rank-sum test, Fig. 3B) and to a lesser  
163 extent PC4 ( $p < 0.05$ ). Visualization of the correlation between each PC and the ATAC-seq signal in the

164 top region sets also shows specificity to the transcription factor-binding regions compared to the  
 165 surrounding genome (Fig. 3C). Thus, COCOA can identify meaningful sources of variation in ATAC-seq  
 166 data, providing a novel tool for regulatory analysis of ATAC-seq data.

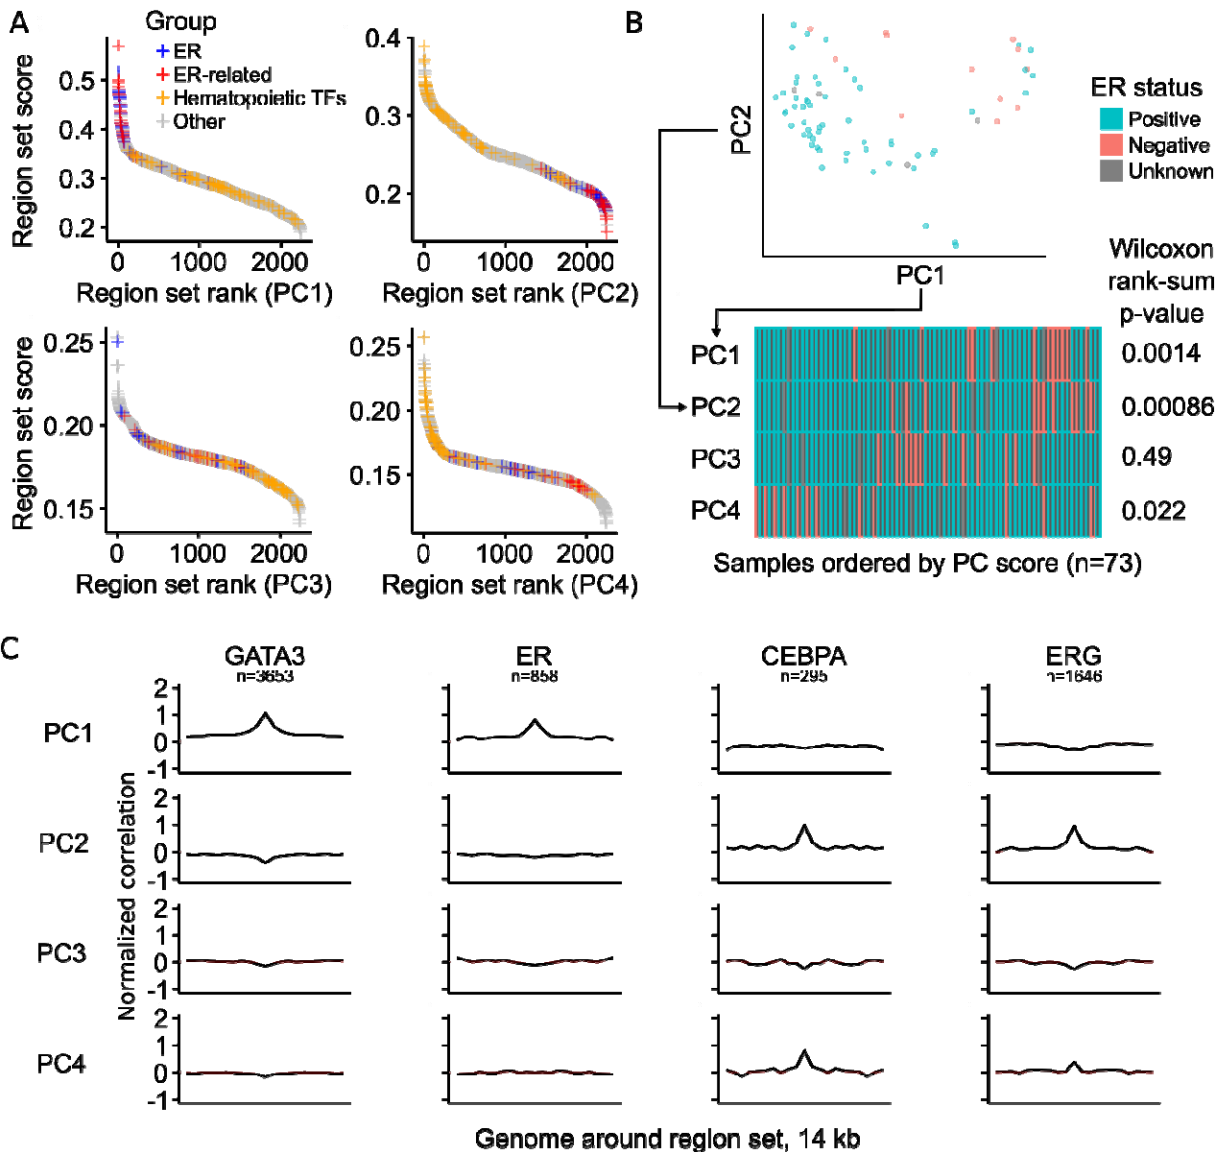

167

168 **Figure 3. COCOA can be used for region-based data such as ATAC-seq.** A. The COCOA score for each region set, ordered from highest to  
 169 lowest. The ER-related group includes GATA3, FOXA1, and H3R17me2. For definition of the hematopoietic TF group, see “Region set database”  
 170 in methods. B. The association of PC scores with ER status for PCs 1-4 based on a Wilcoxon rank-sum test. C. Meta-region profiles of the two  
 171 highest scoring region sets from PC1 (GATA3, ER) and PC2 (CEBPA, ERG). Meta-region profiles show correlation between PC scores and the  
 172 epigenetic signal in regions of the region set, centered on the regions of interest. A peak in the center indicates that chromatin accessibility in  
 173 those regions correlates with the PC specifically around the sites of interest. The number of regions from each region set that were covered by  
 174 the epigenetic data in the COCOA analysis (panel A) is indicated by “n”.



## 175 **COCOA identifies regulatory variation in multi-omics integration**

176 We also aimed to determine if COCOA could annotate inter-sample variation in multi-omics analyses  
177 that integrate epigenetic data with other data types. We therefore applied COCOA to a cohort of 200  
178 chronic lymphocytic leukemia patients<sup>[22]</sup> with gene expression, *ex vivo* drug response, somatic  
179 mutation, and DNA methylation data. We used preprocessed data from MOFA (Multi-Omics Factor  
180 Analysis), a multi-omics dimensionality reduction method that summarized the high-dimensional data  
181 into 10 new dimensions referred to as latent factors (LFs)<sup>[23]</sup>. As part of the published analysis  
182 interpreting the 10 latent factors, the authors used a gene-centric method to annotate the latent factors  
183 with gene sets but only 5 could be associated with gene sets<sup>[10, 23]</sup>. Because COCOA works with data  
184 associated with genomic coordinates, we were able to use the DNA methylation data from the MOFA  
185 analysis with COCOA to annotate the latent factors with region sets. Since only a subset of the DNA  
186 methylation data was used for the MOFA calculations, we calculated the correlation of each CpG in the  
187 450k microarray with each latent factor and used this matrix as input for COCOA. Using COCOA, we are  
188 able to annotate 4 of the 5 latent factors that were not associated with gene sets, demonstrating that  
189 COCOA's region-centric approach complements the gene-centric approach applied by the MOFA authors  
190 (Fig. 4A). For latent factor 1 (LF1), we found variability in region sets for hematopoietic regulatory  
191 regions and transcription factors (Additional file 1: Table S3), consistent with the conclusions of the  
192 original paper that LF1 is related to the hematopoietic differentiation state of the leukemic cell of origin.  
193 The top region set for LF1 was enhancer regions in the GM12878 transformed B-lymphocyte cell line,  
194 which had stark differences in DNA methylation across samples that correlated with IGHV mutation  
195 status, a marker of mature B cells that have undergone somatic hypermutation<sup>[24]</sup> (Fig. 4B). This result  
196 shows that COCOA was able to identify a plausible source underlying the latent factor, a result which  
197 was not identified using gene sets. As another example, we found region sets related to stem cell  
198 biology, including OCT4, NANOG, H3K4me1 from the H9 stem cell line, and SOX2, to be associated with  
199 LF8 (Fig. 4C, Additional file 1: Table S3). Since OCT4 and NANOG activity has been shown to be  
200 associated with  $\beta$  catenin<sup>[25-27]</sup>, a mediator of WNT signaling, our results support and further expand  
201 upon the original association between LF8 and WNT reported by the MOFA authors. These results  
202 demonstrate that COCOA can enable richer multi-omics analysis by annotating the epigenetic  
203 component of inter-sample variation.

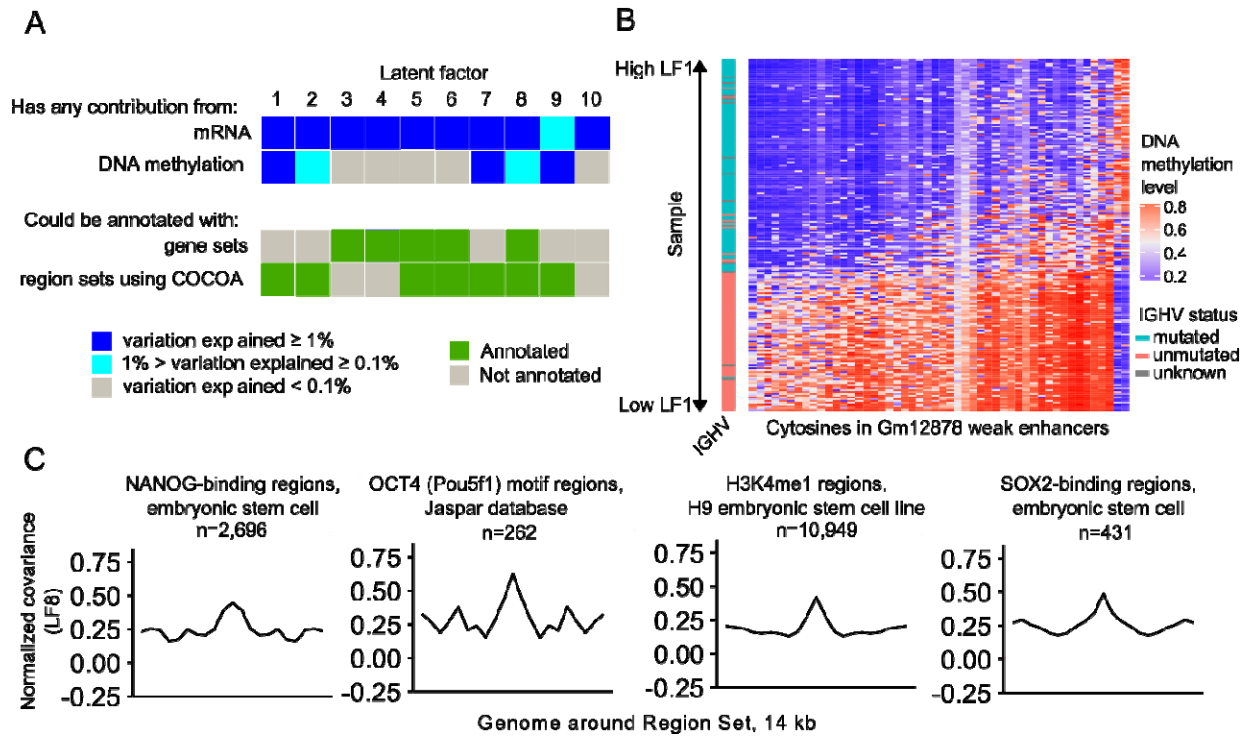

204

205 **Figure 4. COCOA can be applied to multi-omics analyses that include epigenetic data.** A. COCOA can annotate latent factors that were not  
 206 annotated by a gene set approach. In the top of panel A, dark blue indicates that the data type explained at least 1% of the variation of the  
 207 latent factor while light blue indicates that the data type explained between 0.1% and 1% of the variation. Gray indicates less than 0.1%  
 208 explained. In the bottom of panel A, green indicates that at least one statistically significant gene set or region set was found for the latent  
 209 factor and gray indicates no significant gene or region sets were found. B. COCOA identifies an enhancer region set from a transformed B-  
 210 lymphocyte cell line where DNA methylation is correlated with latent factor 1 and IGHV mutation status, a marker of mature B cells that have  
 211 undergone somatic hypermutation. The 50 CpGs with the highest absolute correlation with LF1 from the region set are shown. C. Meta-region  
 212 profiles show covariation between DNA methylation and LF8 score in certain regions bound by transcription factors functional in stem cell  
 213 biology and by H3K4me1 in a stem cell line compared to the surrounding genome. The number of regions from each region set that were  
 214 covered by epigenetic data in the COCOA analysis is indicated by “n”.

## 215 **COCOA reveals associations between epigenetic state and variation in sample phenotype**

216 The three examples thus far demonstrate how COCOA can be applied in an unsupervised analysis, which  
 217 explores biological variation in the absence of known groups. To explore whether we could apply COCOA  
 218 to a setting where groups or phenotypes are known, we extended COCOA to accommodate supervised  
 219 analysis. For the supervised approach, we select a sample phenotype of interest (such as a molecular  
 220 phenotype or a clinical outcome) and then measure the association of epigenetic variation with that  
 221 parameter. To demonstrate a supervised COCOA analysis, we analyzed TCGA 450k methylation  
 222 microarrays from kidney renal clear cell carcinoma (KIRC). This dataset includes a phenotypic annotation  
 223 of cancer stage, which we used as our target variable. We hypothesized that COCOA could associate an

224 epigenetic regulatory state with cancer stage and decreased survival. To test this hypothesis, we used  
225 COCOA to identify region sets where DNA methylation is correlated with cancer stage. We used a  
226 training-validation approach to assess significance of our results (see Methods). In the training samples,  
227 COCOA identified polycomb protein (EZH2 and Suz12)-binding region sets to have the highest  
228 correlation with cancer stage (Fig. 5A, Additional file 1: Table S4). Next, we tested whether the average  
229 DNA methylation level in the top EZH2 region set is associated with cancer stage. In both training and  
230 validation samples, average DNA methylation level in EZH2-binding regions had a significant positive  
231 correlation with cancer stage ( $p < 10^{-16}$  and  $p < 10^{-7}$ ,  $t$  approximation) showing that the COCOA result  
232 extends beyond the training set (Fig. 5B, Additional file 1: Table S5). Higher DNA methylation levels in  
233 EZH2-binding regions in advanced stages of cancer suggest that these regions could be repressed in  
234 advanced cancer stages, which would be consistent with higher activity of the repressive protein EZH2.  
235 This result is consistent with previous studies, which have found that higher EZH2 expression could  
236 promote metastasis in renal cell carcinoma<sup>[28]</sup> and other cancers<sup>[29-31]</sup> and is associated with a more  
237 advanced cancer stage<sup>[32, 33]</sup>.

238 To further assess the relevance of our COCOA results, we tested the association between DNA  
239 methylation in our top EZH2 region set and patient survival. We compared the quartile of patients with  
240 highest average DNA methylation in the EZH2 region set to the quartile of patients with the lowest  
241 average DNA methylation, using a Kaplan-Meier estimate (Fig. 5C). Patients with higher EZH2 region set  
242 DNA methylation have significantly decreased survival compared to those with lower DNA methylation  
243 ( $p < 0.01$ , log-rank test, Fig. 5C). A Cox proportional hazards model correcting for age, gender and  
244 average genome methylation levels also revealed a significant association between average DNA  
245 methylation level in EZH2 binding regions and patient survival ( $p < 10^{-4}$ , Fig. 5D, Additional file 1: Table  
246 S6). Previous studies found EZH2 expression to be prognostic for survival in renal cell carcinoma and  
247 other cancers<sup>[29, 32, 34]</sup>, but to our knowledge, this is the first demonstration that DNA methylation levels  
248 in EZH2 binding regions could be prognostic for survival in renal cell carcinoma. We further assessed for  
249 cancer stage and survival association for the top TF region sets from the COCOA analysis. We tested the  
250 two highest scoring TFs – JUND and TCF7L2. In the validation data, DNA methylation in JUND-binding  
251 regions had a significant negative correlation with cancer stage ( $p=0.022$ ,  $t$  approximation) but we could  
252 not validate its association with survival because it did not satisfy the Cox proportional hazards  
253 assumption (Fig. S7A, Additional file 1: Table S6). DNA methylation in TCF7L2-binding regions was not  
254 significantly correlated with cancer stage in the validation data (Fig. S7B, Additional file 1: Table S5) but

255 higher DNA methylation was significantly associated with better overall survival ( $p = 0.038$ , Cox  
 256 proportional hazards model, Fig. S7C, Additional file 1: Table S6). Through this supervised analysis, we  
 257 demonstrate that COCOA can identify epigenetic variation related to a given sample phenotype of  
 258 interest, providing a novel means for targeted analysis of epigenetic variation.

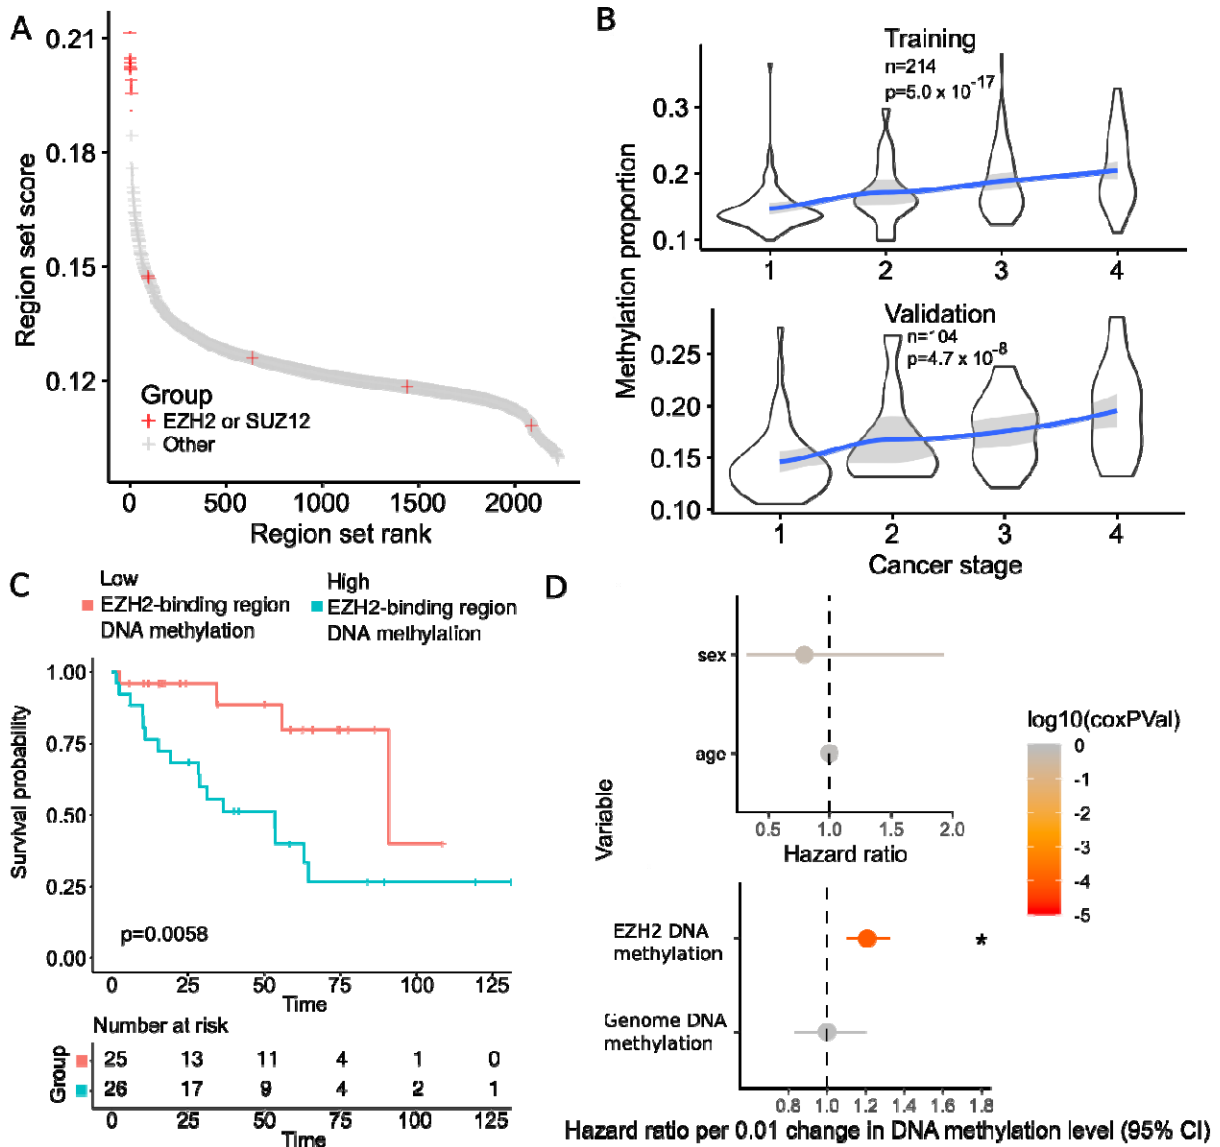

259

260 **Figure 5. COCOA identifies region sets related to a patient phenotype of interest, cancer stage.** A. Region sets for the polycomb proteins EZH2  
 261 and SUZ12 were the top region sets related to cancer stage. B. Average DNA methylation level in EZH2-binding regions (the top EZH2 region set)  
 262 increases with cancer stage. P-values by  $t$  approximation with null hypothesis that correlation is zero. C. Kaplan-Meier curves of the validation  
 263 samples, grouping samples by average DNA methylation in EZH2 binding regions (25% highest samples and the 25% lowest samples). P-value  
 264 from log-rank test. E. Cox proportional hazards model of average DNA methylation in the top EZH2-binding region set, correcting for age,  
 265 gender, and average genome methylation level.

266 **DNA methylation in EZH2-binding regions is associated with cancer stage and survival in multiple**  
267 **cancers**

268 Given that COCOA identified associations with EZH2 region sets in both our unsupervised analysis of  
269 breast cancer and our supervised analysis of kidney renal cell carcinoma, we wondered whether the link  
270 with EZH2 and DNA methylation would hold true for other cancer types. To test this, we performed a  
271 pan-TCGA analysis investigating the association between average DNA methylation in EZH2/SUZ12-  
272 binding regions and cancer stage as well as overall patient survival. We combined regions from the top  
273 group of 11 EZH2 and SUZ12 region sets from the KIRC analysis (Fig. 5A, Additional file 1: Table S4) to  
274 generate a single EZH2/SUZ12 region set, referred to hereafter simply as EZH2-binding regions. We then  
275 computed the average DNA methylation in this region set for each sample and tested its association  
276 with either cancer stage or overall survival. We found a significant correlation between DNA methylation  
277 in EZH2-binding regions and cancer stage in multiple cancer types (Fig. S8, Additional file 1: Tables S7  
278 and S8). DNA methylation in EZH2-binding regions positively correlated with cancer stage in 5 of 21  
279 tested cancers, but trended negative in 3 cancer types (Fig. S8), of which colon adenocarcinoma (COAD)  
280 had a significant negative correlation ( $p < 0.05$ ,  $t$  approximation, Holm-Bonferroni correction), consistent  
281 with a previous report<sup>[35]</sup>. To further investigate the significance of the EZH2-binding regions, we used a  
282 Cox proportional hazards model to test for association between survival and average DNA methylation  
283 in these regions and found a significant association in 5 cancer types (Fig. 6, Additional file 1: Tables S8  
284 and S9). Similar to the cancer stage analysis, higher DNA methylation level was more often associated  
285 with increased risk of death, but trended to lower risk in a few cancer types (Fig. 6). This result is  
286 consistent with previous reports that EZH2 can be either oncogenic or a tumor suppressor<sup>[31, 36, 37]</sup> and  
287 emphasizes the context-specific effects of EZH2. Our pan-cancer analysis also supports previous reports  
288 suggesting that polycomb activity may be commonly dysregulated in cancer<sup>[31]</sup> and may influence  
289 survival in a variety of cancers, with some cancers having a positive and others a negative association<sup>[31]</sup>.  
290 Our results contrast with previous reports for several cancer types (Supplementary Discussion). This  
291 analysis identified a novel connection between EZH2 and survival in adrenocortical carcinoma (ACC),  
292 which has not been previously demonstrated. Furthermore, we have shown for the first time that  
293 variation in DNA methylation at EZH2-binding regions is associated with cancer stage and patient  
294 survival across a variety of cancers. Overall, this analysis demonstrates the ability of COCOA to annotate  
295 epigenetic variation and its potential to generate new mechanistic hypotheses about epigenetic  
296 heterogeneity and disease drivers.

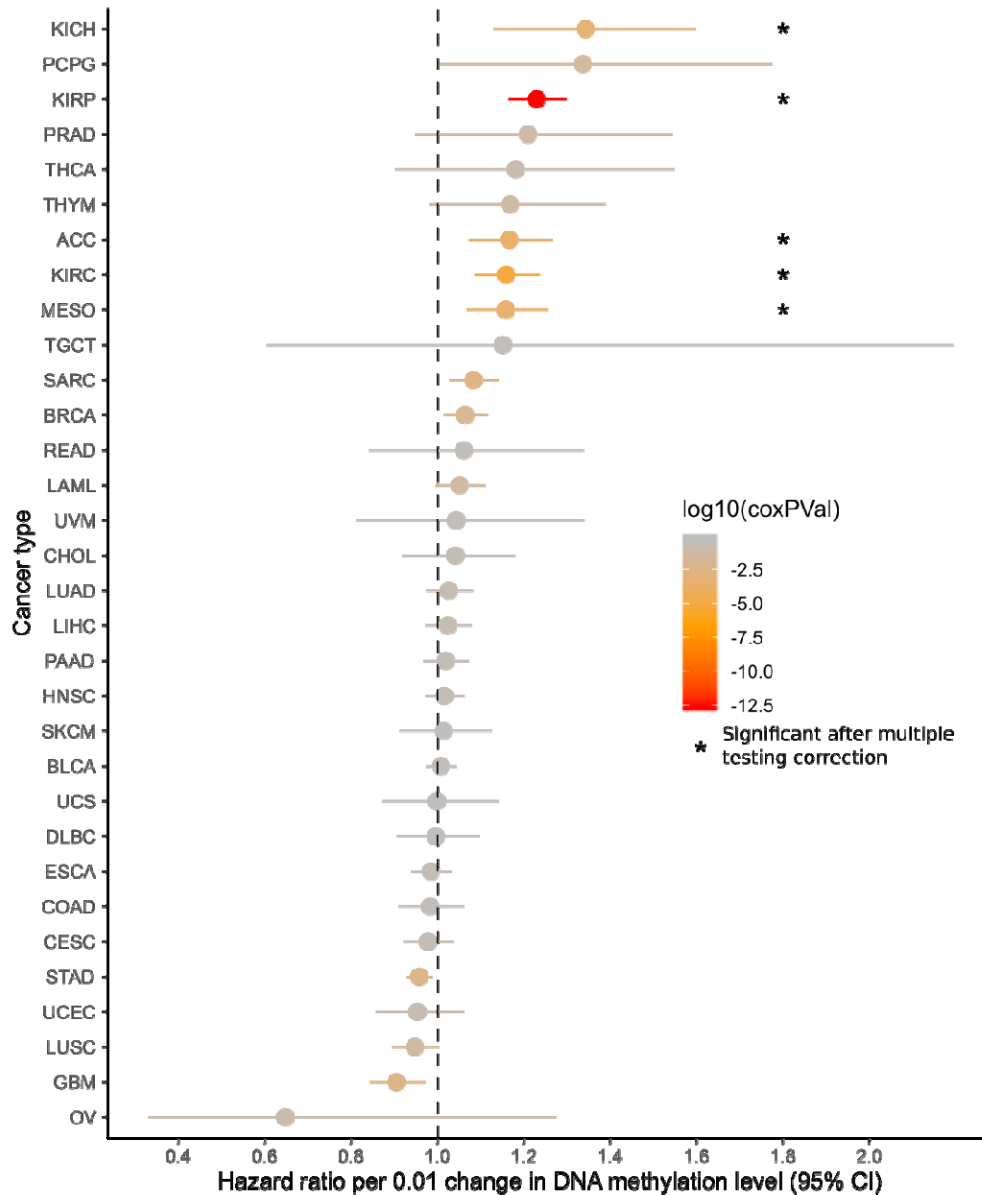

297

298

299

300

**Figure 6. Pan-cancer survival analysis of DNA methylation in EZH2/SUZ12-binding regions.** The mean hazard ratio and 95% confidence interval for the average DNA methylation in EZH2/SUZ12-binding regions are shown for each cancer type. Color indicates the raw p-values and asterisks mark significance after Holm-Bonferroni correction.

301

### Comparison of COCOA to other methods

302

COCOA distinguishes itself from other methods by being the only method of its type for DNA

303

methylation data and by its flexibility in supporting a wide range of analyses for epigenetic data. We

304

conceptualize COCOA as being in a class of methods that relies on covariation of epigenetic signal to

305

annotate epigenetic variation. This separates COCOA from the methods that annotate epigenetic

306

variation without taking into account covariation. To demonstrate the power of this approach, we

307 compared COCOA to LOLA, a method that does not consider covariation. This analysis demonstrated  
308 that COCOA has superior ability to mitigate noise (Supplemental Information; Fig. S9; Additional file 1:  
309 Tables S10, S11, S12). Other methods that do take into account covariation have key differences from  
310 COCOA. First, while tools exist that aggregate signal in related groups such as gene sets or region sets  
311 and use PCA to identify covariation of signal across samples (Table 1), no existing tool does this for DNA  
312 methylation data. Second, COCOA creates a generalized framework for region set analysis which results  
313 in great flexibility in applications. This generalized framework allows COCOA to be used in analyses that  
314 other tools may not support: with multiple epigenetic data types, for supervised or unsupervised  
315 analyses, with a variety of mathematical metrics, and for single-omic or multi-omic analyses. For a brief  
316 description of each method from Table 1 and further comparison to COCOA, see “Comparison of COCOA  
317 to other region set or covariation-based methods” in the supplementary text. Of the epigenetic tools  
318 with similar goals to COCOA, chromVAR<sup>[2]</sup> is the most widely used and most similar to COCOA in its input  
319 type. Therefore, we selected chromVAR for comparison to COCOA with the breast cancer ATAC-seq  
320 data. Each method revealed relevant but partially divergent aspects of inter-sample variation. COCOA  
321 had an improved ability to identify ER-related epigenetic variation and to separate biological signals with  
322 its use of PCA (Fig. S10, Supplementary Information: “Comparison of COCOA to chromVAR”, Additional  
323 file 1: Tables S2, S13). COCOA also extends beyond chromVAR in COCOA’s analysis options and  
324 supported data types. COCOA thus provides a novel framework for flexible covariation-based analysis of  
325 DNA methylation and other epigenetic data. ameliorate  
326

|            | primary data type is DNA methylation data | primary data type is chromatin accessibility data | primary data type is gene or protein expression data | single cell focus | supports multi-omic analysis | region-centric  | aggregates signal in genome-scale groups | uses PCA or matrix factorization | supervised (S), unsupervised (U), or both (B) | programming language |
|------------|-------------------------------------------|---------------------------------------------------|------------------------------------------------------|-------------------|------------------------------|-----------------|------------------------------------------|----------------------------------|-----------------------------------------------|----------------------|
| COCOA      | ✓                                         | ✓                                                 | ✗                                                    | ✗                 | ✓                            | ✓               | ✓                                        | ✓                                | B                                             | R                    |
| chromVAR   | ✗                                         | ✓                                                 | ✗                                                    | ✓                 | ✗                            | ✓               | ✓                                        | ✗                                | U                                             | R                    |
| BROCKMAN   | ✗                                         | ✓                                                 | ✗                                                    | ✓                 | ✗                            | ✓ <sup>*1</sup> | ✓                                        | ✓                                | U                                             | R/Python             |
| PCGSE      | ✗                                         | ✗                                                 | ✓                                                    | ✗                 | ✓                            | ✗               | ✓                                        | ✓                                | U                                             | R                    |
| MOGSA      | ✗                                         | ✗                                                 | ✓ <sup>*2</sup>                                      | ✗                 | ✓                            | ✗               | ✓                                        | ✓                                | U                                             | R                    |
| pathwayPCA | ✗                                         | ✗                                                 | ✓ <sup>*2</sup>                                      | ✗                 | ✓                            | ✗               | ✓                                        | ✓                                | B                                             | R                    |
| coMethDMR  | ✓                                         | ✗                                                 | ✗                                                    | ✗                 | ✗                            | ✓ <sup>*1</sup> | ✗                                        | ✗                                | U                                             | R                    |

327

328

**Table 1. Features of COCOA and related methods.** <sup>\*1</sup>BROCKMAN uses k-mer counts but the regions containing each k-mer can be

329

conceptualized as a region set. <sup>\*2</sup>MOGSA and pathwayPCA can involve multiple “omics” data types but including gene-centric data such as gene

330

or protein expression is important for the methods. <sup>\*3</sup>coMethDMR finds differentially methylated regions but often annotates them in

331

reference to genes.

332

## 333 Conclusion

334

We created a flexible framework for identifying and understanding sources of regulatory variation in

335

epigenetic data. COCOA could be applied to any epigenetic data that has a value associated with

336

genomic coordinates, which includes both nucleotide-level data such as bisulfite sequencing and region-

337

based data such as ATAC-seq data. Our results also demonstrate how COCOA can be integrated with

338

multi-omics analyses that include epigenetic data. Our tool allows scientists to leverage publicly

339

available regulatory data to annotate variation in their epigenetic data. In an unsupervised analysis,

340

COCOA can annotate the major axes of inter-sample variation. In a supervised analysis, COCOA can

341

annotate inter-sample variation related to a specific phenotype of interest. We have released COCOA as

342

a Bioconductor package<sup>[38]</sup>, facilitating this new method of regulatory analysis. COCOA is a flexible and

343

powerful method for interpreting regulatory variation between individuals.

344

345



## 346 **Methods**

---

### 347 **COCOA algorithm**

#### 348 ***Overview***

349 COCOA annotates variation in epigenetic data through two steps. In the first, we quantify the  
350 association between each feature in the epigenetic data and the target variable using a metric such as  
351 correlation (Fig. 1C). This gives a score to each epigenetic feature that represents how much it is  
352 associated with the target variable. Then in the second step, we use the epigenetic feature scores to  
353 score region sets from a large collection of region sets (Fig. 1D). Finally, we use a permutation test to  
354 assess statistical significance, and return a ranked list of region sets.

#### 355 ***Step 1: Quantifying variation across samples***

356 COCOA starts with a data matrix of epigenetic signal values in genomic regions, where each row is a  
357 genomic locus (e.g. a CpG or an ATAC-seq region), and each column is a sample. The values in the matrix  
358 correspond to signal intensity levels (e.g. DNA methylation level or chromatin accessibility) of a given  
359 sample at a given locus. The first step in a COCOA analysis is to transform the original data into a score  
360 for each locus measuring how much it contributes to the target inter-sample variation. We refer to the  
361 score for an epigenetic feature (locus) as a “feature contribution score” (FCS). This calculation can be  
362 either supervised or unsupervised (Fig. 1B):

363 ***Supervised.*** For supervised analyses, the goal is to identify sources of variation associated with a target  
364 sample phenotype of interest. Therefore, in addition to the epigenetic data matrix, we require a vector  
365 representing the target sample phenotype. We then quantify the association between the target sample  
366 phenotype and the epigenetic signal at each genomic locus using a method such as Pearson correlation.  
367 We end up with a vector of scores (which for correlation is the correlation coefficient) representing how  
368 strongly epigenetic variation at a genomic locus is associated with variation in the sample phenotype.  
369 Metrics other than Pearson correlation can be used to quantify variation, as long as they produce a  
370 score for each genomic locus. A detailed discussion of metric choice follows in the section, *Metric for*  
371 *quantifying variation.*

372 **Unsupervised.** For unsupervised analyses, we first apply a dimensionality reduction technique such as  
373 PCA or MOFA<sup>[23]</sup> to identify latent factors that represent significant sources of inter-sample variation<sup>[10]</sup>.  
374 Then, we treat these latent factors as target sample phenotypes and quantify the association between  
375 each latent factor and the epigenetic data as we would for the sample phenotype in the supervised  
376 analysis. In this case, the feature contribution score for each genomic locus represents how strongly  
377 epigenetic variation at that genomic locus is associated with variation in the latent factor.

### 378 **Step 2: Annotate variation with the COCOA algorithm**

379 After quantifying inter-sample variation, we are left with one or more vectors that assign FCS to each  
380 genomic locus in the original data matrix. COCOA next seeks to determine which region sets are  
381 associated with that variation. For this step, COCOA relies on a database of region sets. Here, we have  
382 used a subset of the LOLA database<sup>[1]</sup>, which includes several thousand region sets that have been  
383 manually collected from several large-scale experiments and databases, including the ENCODE<sup>[39, 40]</sup> and  
384 Roadmap Epigenomics projects<sup>[41, 42]</sup>. For the sample-specific data, COCOA can operate on two types of  
385 signal data: single-nucleotide data (e.g. DNA methylation) or region-based data (e.g. ATAC-seq peaks). In  
386 either case, we will aggregate the scores for all individual genomic loci into a combined score for each  
387 region set (Fig. 1D). Due to different experiments testing the same TF or histone modification, some  
388 region sets share similar regions to each other and therefore their scores are not completely  
389 independent.

390 For single base-pair resolution data (e.g. DNA methylation data), the following algorithm is used for a  
391 single region set and a single FCS vector: First, we optionally take the absolute value of the FCS  
392 (Supplementary Methods). Then, we identify all features whose genomic coordinates overlap the given  
393 region set. Within each region from the region set, we average the FCS of any overlapping features to  
394 get a single average value for each region. We then average the region scores to get the final score for  
395 that combination of region set and FCS vector. This score represents how much that region set is  
396 associated with the latent factor or phenotype that corresponds to the FCS vector. We repeat this  
397 process for each pairwise combination of region set and latent factor/phenotype FCS vector.

398 For region-based data such as ATAC-seq data, the scoring is conceptually similar to single-nucleotide  
399 data, but with slight differences. We use the following algorithm: To score a region set for a given latent  
400 factor or phenotype, we first identify all overlaps between “data regions” (regions for the epigenetic  
401 signal data) and region set regions. For each overlap, we calculate what proportion of the region set

402 region is overlapped by the data region. We then take a weighted average of the FCS of all the  
403 overlapping data regions, weighting each data region's FCS by the proportion that region overlaps a  
404 region set region and dividing by the sum of all overlap proportions. This weighted average is the region  
405 set score that represents how much the region set is associated with the latent factor or phenotype. We  
406 repeat this process for each combination of region set and latent factor/phenotype.

407 COCOA also offers alternative scoring methods including the option to use the median instead of the  
408 mean. We discuss this option in the Supplementary Discussion where we compare results for COCOA of  
409 breast cancer DNA methylation using median and mean scoring methods, finding overall similar results  
410 and high correlation between median and mean scores (Fig. S11, Additional file 1: Tables S1, S14). Other  
411 scoring options can be found in the software documentation.

### 412 ***Metric for quantifying variation***

413 Choosing an appropriate metric can help to effectively capture the relationship between epigenetic  
414 variation and variation in the target variable (Supplementary Methods). In this paper, we used  
415 covariance, Pearson correlation, Spearman correlation, PCA, and MOFA<sup>[23]</sup> to quantify variation, but  
416 other variation metrics and dimensionality reduction techniques can be used with COCOA for  
417 quantifying inter-sample variation, depending on the specific circumstances of a given analysis. The only  
418 requirement is that the metric must provide a score for each epigenetic locus that quantifies how much  
419 it is associated with variation in the target variable. The choice of metric can depend on the data type.

420 For DNA methylation data, since DNA methylation data is bounded from 0 to 1, we used covariance to  
421 give greater weight to CpGs with larger changes in DNA methylation across samples. Since the range of  
422 ATAC-seq counts could be very different between different peaks, we used Pearson correlation for the  
423 ATAC-seq data in order to give each peak a comparable score, regardless of the peak's range. This  
424 principle also applies to PCA. When performing PCA, we recommend scaling the data by dividing each  
425 variable by its variance for ATAC-seq data (equivalent to correlation) but not for DNA methylation data  
426 (equivalent to covariation). Then, when treating the principal components as the target variables, we  
427 use the corresponding metric -- covariance or correlation -- to get the feature scores. We recommend  
428 Spearman correlation when the relationships between the target variable and the epigenetic features  
429 are monotonic but not linear, as may occur when the target variable is ordinal (e.g. cancer stage).

430

## 431 **Permutation test**

432 To assess statistical significance of the COCOA results, we use a permutation test. For both supervised  
433 and unsupervised COCOA analyses, we have a target variable (i.e. the sample phenotype or latent  
434 factor) and want to understand the relationship between the target variable and the epigenetic data.  
435 For a single permutation, we randomly shuffle the samples' target variable values then recalculate the  
436 association between the epigenetic data and the target variable as done in Step 1 (Fig. 1C). This gives  
437 each epigenetic feature an FCS for the shuffled target variable. Then we run COCOA on the new feature  
438 contribution scores to score each region set in the database. This process is repeated for each  
439 permutation. The COCOA scores for a given region set from the permutations form a region set-specific  
440 null distribution. Because the sample labels were shuffled instead of the epigenetic data, the null  
441 distributions can appropriately capture the correlation structure of the epigenetic data, accounting for  
442 the correlation between epigenetic features in a given region set. The region set-specific null  
443 distributions also protect against false positives that could arise from some region sets being more fully  
444 covered by the epigenetic assay than others because each score in a region set's null distribution is  
445 created from the same coverage profile. To reduce the computational burden, we calculated 300  
446 permutations and applied a permutation approximation technique<sup>[43]</sup>. We fit a gamma distribution to  
447 each null distribution using the method of moments in the `fitdistrplus` R package<sup>[44]</sup> and then calculated  
448 a p-value for each region set using its gamma distribution. To test the appropriateness of fit of the  
449 gamma approximation, we ran a simulation study with 100,000 permutations, and then subsampled and  
450 applied the approximation to see how close the approximation is to the true p-value. Our conclusion is  
451 that the gamma approximation is accurate for high p-values, but the gamma approximation may  
452 overestimate the significance of low p-values; therefore, we advise that it can be helpful for screening  
453 out region sets that are not significant (Fig S12; further discussion in Supplementary Information). To  
454 correct p-values for the number of region sets tested, we used Benjamini-Hochberg false discovery rate  
455 (FDR) correction<sup>[45]</sup> with an FDR of 5%.

## 456 **Meta-region profile plots**

457 To visualize results, COCOA produces a plot we call the *meta-region profile* plot (e.g. Fig 2C). The goal of  
458 the meta-region profile is to compare the feature contribution scores in the regions of interest to the  
459 surrounding genome to assess how specific the captured signal is to a region set. We combine  
460 information from all regions of the region set into a single summary profile as has been done for DNA

461 methylation data<sup>[3, 6]</sup>. Each region in the region set is expanded on both sides to include the surrounding  
462 genome (e.g. expanded to 14 kb total, centered on the region of interest). This enlarged region is then  
463 split into bins of approximately equal size. Finally, the FCS for corresponding bins from each region of  
464 the region set are averaged to get a single “meta-region” FCS profile. A peak in the middle of this profile  
465 suggests that there is variation that is specific to this region set.

#### 466 **Region set database**

467 To annotate variation in the epigenetic data, we used a subset of the LOLA database<sup>[1]</sup> (filtered with R  
468 script, see Supplementary Materials), totaling 2246 region sets from public sources. Sources included  
469 the ENCODE project<sup>[39, 40]</sup>, Roadmap Epigenomics<sup>[41, 42]</sup>, CODEX database<sup>[46]</sup>, and the Cistrome  
470 database<sup>[47]</sup>. Additionally, we included some region sets derived from JASPAR motif<sup>[48]</sup> predictions.  
471 Examples of region sets include transcription factor binding sites from ChIP-seq experiments, histone  
472 modification regions from ChIP-seq experiments, and cell type or condition-specific accessible chromatin  
473 from ATAC-seq experiments. For a discussion of how to choose a region set database and other related  
474 considerations, see Additional file 1. For each analysis, we only considered in the results region sets that  
475 had at least 100 regions with any coverage by the epigenetic data. Since the CLL MOFA data was in  
476 reference genome hg19 and the breast cancer data was in hg38, we used the corresponding hg19 or  
477 hg38 version of the region set database when analyzing each dataset. A brief description of the region  
478 sets can be found in the supplementary data (Additional file 1: Tables S1-S4) and the database is  
479 available at <http://databio.org/regiondb><sup>[1]</sup>. To designate region sets “hematopoietic TFs” for Fig. 3, we  
480 did a literature search, selecting three reviews: one focusing on myeloid TFs<sup>[49]</sup>, one focusing on  
481 lymphoid TFs<sup>[50]</sup> and one general hematopoietic TF<sup>[51]</sup>. The hematopoietic TFs identified from these  
482 reviews are the following: RUNX1, TAL1, PU.1, CEBPA, IRF8, GFI1, CEBPE<sup>[49]</sup>, TCF3, EBF1, PAX5, FOXO1,  
483 ID2, GATA3<sup>[50]</sup>, KLF1, GATA1, GATA2, IKZF1, CMYB, and NFE2<sup>[51]</sup>. Since GATA3 was also identified as an  
484 ER-related TF, we did not consider GATA3 as a hematopoietic TF in plots to avoid confusion.

#### 485 **Breast cancer analyses**

##### 486 ***Datasets***

487 For the unsupervised breast cancer analyses, we used DNA methylation and ATAC-seq datasets from The  
488 Cancer Genome Atlas (TCGA). We retrieved the DNA methylation and clinical data with the TCGAbiolinks  
489 R package<sup>[52]</sup>. We identified 657 patients with both 450k DNA methylation data and known ER and

490 progesterone status. For the ATAC-seq data, we retrieved a peak count matrix for the consensus set of  
491 breast cancer ATAC-seq peaks identified by Corces et al. from the following location:  
492 [https://atacseq.xenahubs.net/download/brca/brca\\_peak\\_Log2Counts\\_dedup](https://atacseq.xenahubs.net/download/brca/brca_peak_Log2Counts_dedup). We used a sample ID  
493 lookup table to match the ATAC-seq IDs to the standard TCGA identifiers: [https://gdc.cancer.gov/about-](https://gdc.cancer.gov/about-data/publications/ATACseq-AWG)  
494 [data/publications/ATACseq-AWG](https://gdc.cancer.gov/about-data/publications/ATACseq-AWG). We excluded one patient of the 74 patients with ATAC-seq data  
495 (TCGA-AO-A0J5) for whom we did not have sufficient metadata.

#### 496 ***Data processing and quantifying variation***

497 For the breast cancer DNA methylation data, we excluded the sex chromosomes. For the ATAC-seq data,  
498 we used the peak count matrix from Corces et al.<sup>[21]</sup>, without further processing. We performed PCA on  
499 the DNA methylation data and the ATAC-seq data separately with the `prcomp` R function, with  
500 centering and without scaling. PCA is used to get covariance of features and to prioritize the largest  
501 sources of covariance. After PCA, we calculated the covariance or correlation coefficient for each  
502 epigenetic feature with each latent factor to get a value that represented how much each feature  
503 contributed to each latent factor. We used covariation for the DNA methylation data and correlation for  
504 the chromatin accessibility data. To test the association of ER status with PC score, we used the  
505 Wilcoxon rank-sum test with ER positive samples and ER negative samples as the two groups.

#### 506 ***Comparison of COCOA and chromVAR***

507 To compare COCOA and chromVAR<sup>[2]</sup>, we completed two tests with the breast cancer ATAC-seq data.  
508 First, we applied chromVAR with the same region set database used by COCOA in our ATAC-seq analysis.  
509 Second, we applied COCOA and chromVAR with the main motif database used by chromVAR in its  
510 publication, which is a curated version of the cisBP database<sup>[53]</sup> and is available as the  
511 "human\_pwm\_v1" data object from the "chromVARmotifs" R package that can be downloaded from  
512 the "GreenleafLab/chromVARmotifs" Github repository. We applied chromVAR to the normalized data  
513 from Corces et al., adding a pseudocount to bring the minimum normalized signal up to zero. To use the  
514 motif database with COCOA, we identified peaks with motif hits using the "matchMotifs" function from  
515 the "motifmatchr" R package<sup>[54]</sup> with default parameters and took those regions as a region set. The  
516 "matchMotifs" function is the method chosen by chromVAR authors for identifying motif matches in the  
517 chromVAR Bioconductor vignette. For the chromVAR figure, we designated motifs as AP-1-related  
518 based on an AP-1 review (Figure 1 of review)<sup>[55]</sup>.

519

## 520 **Multi-omics chronic lymphocytic leukemia analysis**

### 521 ***Datasets***

522 For the unsupervised multi-omics analysis, we used preprocessed data that was included with the MOFA  
523 R package, specifically the latent factors from the multi-omics dimensionality reduction analysis of 200  
524 chronic lymphocytic leukemia (CLL) patients as described by Argelaguet et al.<sup>[22, 23]</sup>. We retrieved the  
525 450k DNA methylation data for these patients using the ExperimentHub R package<sup>[56]</sup> (CLLmethylation  
526 data package, ExperimentHub ID: EH1071)<sup>[22]</sup>.

### 527 ***Data processing and quantifying variation***

528 For the multi-omics analysis, we used the dimensionality reduction results from the paper by Argelaguet  
529 et al. and then extended the results to CpGs that were not included in the dimensionality reduction. The  
530 original multi-omics analysis used only the most variable 1% of CpGs (4,248 CpGs) for calculation of the  
531 latent factors. Since COCOA benefits from higher coverage of CpGs across the genome, we calculated  
532 the correlation of each CpG from the DNA methylation microarrays (excluding sex chromosomes) with  
533 each latent factor. This yielded a matrix with CpG, latent factor correlations where each row is a CpG  
534 and each column is a latent factor, which can be used as input to COCOA.

## 535 **Kidney renal clear cell carcinoma analysis**

### 536 ***Dataset***

537 For the supervised KIRC analysis, we used DNA methylation and clinical data from The Cancer Genome  
538 Atlas. We used 450k DNA methylation microarray data for 318 patients, retrieved with the  
539 curatedTCGAData R package<sup>[57]</sup>. The clinical data included cancer stage and survival information that was  
540 used to label samples in the supervised analysis.

### 541 ***Data processing and quantifying variation***

542 For the supervised analysis of KIRC methylation, we first split the data into two groups: training (2/3 of  
543 patients) and validation (1/3 of patients), keeping approximately equal proportions of each cancer stage  
544 in each group. With the COCOA samples, we first calculated the Spearman correlation between the DNA

545 methylation levels and the sample phenotype of interest, cancer stage. This resulted in a correlation  
546 coefficient for each CpG. We then applied the COCOA algorithm on the absolute correlation coefficients.

### 547 ***Validation and survival analysis***

548 After running COCOA on 2/3 of the samples, we did validation analyses on the remaining 1/3 of samples.  
549 First, we tested whether each patient's average DNA methylation level in the top EZH2 region set from  
550 COCOA was correlated with cancer stage, using the 'cor.test' R function<sup>[58]</sup> and Spearman correlation. To  
551 calculate correlation p-values for the null hypothesis that the correlation was zero, we used an  
552 asymptotic *t* approximation, the default method used by the 'cor.test' function. To calculate the average  
553 methylation, we first separately averaged DNA methylation within each EZH2 region, then averaged all  
554 the region averages. We also tested whether average DNA methylation in EZH2 regions was related to  
555 overall patient survival. We created Kaplan-Meier curves with two groups: the 25% of validation samples  
556 with highest DNA methylation in EZH2 regions and the 25% of samples with the lowest DNA  
557 methylation. We used a log-rank test from the 'survminer' R package's 'ggsurvplot' function<sup>[59]</sup> to get a  
558 p-value for the Kaplan-Meier curves. We created a Cox proportional hazards model with all validation  
559 samples, relating average DNA methylation in EZH2 regions to patient survival and correcting for age,  
560 gender, and average genome methylation level. We also tested the two highest scoring TF region sets  
561 from the COCOA analysis – JUND and TCF7L2 -- for association with cancer stage and survival using the  
562 methods described above. We tested whether variables satisfied the proportional hazards assumption  
563 using the 'cox.zph' function in R<sup>[60-62]</sup> (Additional file 1: Table S6), considering variables with  $p < 0.05$  as  
564 not satisfying the assumption. The JUND validation model did not meet the assumption for the variable  
565 of interest (average DNA methylation in EZH2/SUZ12-binding regions) and therefore was not  
566 considered.

### 567 **Pan-cancer EZH2 analysis**

568 In this analysis, we tested whether average DNA methylation level in EZH2-binding regions would be  
569 associated with cancer stage and patient survival in other cancer types than KIRC. We combined regions  
570 from the top group of 11 EZH2 and SUZ12 region sets from the KIRC analysis (Fig. 5A, Supplementary  
571 Data) to make a single "master" EZH2/SUZ12 region set (referred to as EZH2-binding regions). We took  
572 the union of all regions and merged regions that overlapped. We downloaded DNA methylation  
573 microarray data for 33 TCGA cancer types using the curatedTCGAData R package<sup>[57]</sup>. Then, for each  
574 sample, we calculated the average DNA methylation level in EZH2-binding regions. For each cancer type



575 for which we had cancer stage information (21/33), we calculated the Spearman correlation between  
576 average EZH2-binding region DNA methylation and cancer stage, using the ‘cor.test’ R function<sup>[58]</sup>. To  
577 calculate correlation p-values for the null hypothesis that the correlation was zero, we used an  
578 asymptotic *t* approximation, the default method used by the ‘cor.test’ function. Next, for each cancer  
579 type, we used a Cox proportional hazards model to test the association of average EZH2-binding region  
580 DNA methylation with survival, with the covariates patient age, sex, and average microarray-wide DNA  
581 methylation level as available. We tested whether variables satisfied the proportional hazards  
582 assumption using the ‘cox.zph’ function in R<sup>[60-62]</sup> (Additional file 1: Table S9). We considered variables  
583 with  $p < 0.01$  as not satisfying the assumption, picking a more stringent cutoff because more models  
584 were tested. Models that did not meet the assumption for the variable of interest (average DNA  
585 methylation in EZH2/SUZ12-binding regions) were removed, in our case only one cancer type— low grade  
586 glioma (LGG). We corrected Spearman and Cox p-values for multiple testing using the Holm-Bonferroni  
587 method<sup>[63]</sup>.

## 588 **Abbreviations**

589 Adrenocortical carcinoma (ACC), Bladder Urothelial Carcinoma (BLCA), Breast invasive carcinoma  
590 (BRCA), Cervical squamous cell carcinoma and endocervical adenocarcinoma (CESC),  
591 Cholangiocarcinoma (CHOL), Chronic lymphocytic leukemia (CLL), Colon adenocarcinoma (COAD),  
592 Coordinate Covariation Analysis (COCOA), Lymphoid Neoplasm Diffuse Large B-cell Lymphoma (DLBC),  
593 Estrogen receptor (ER), Esophageal carcinoma (ESCA), Feature contribution score (FCS), False discovery  
594 rate (FDR), Glioblastoma multiforme (GBM), Head and Neck squamous cell carcinoma (HNSC), Kidney  
595 Chromophobe (KICH), Kidney renal clear cell carcinoma (KIRC), Kidney renal papillary cell carcinoma  
596 (KIRP), Acute Myeloid Leukemia (LAML), Latent factor (LF), Liver hepatocellular carcinoma (LIHC), Lung  
597 adenocarcinoma (LUAD), Lung squamous cell carcinoma (LUSC), Mesothelioma (MESO), Multi-omics  
598 factor analysis (MOFA), Ovarian serous cystadenocarcinoma (OV), Pancreatic adenocarcinoma (PAAD),  
599 Principal component analysis (PCA), Pheochromocytoma and Paraganglioma (PCPG), Prostate  
600 adenocarcinoma (PRAD), Repressor of estrogen activity (REA), Rectum adenocarcinoma (READ),  
601 Sarcoma (SARC), Skin Cutaneous Melanoma (SKCM), Stomach adenocarcinoma (STAD), The Cancer  
602 Genome Atlas (TCGA), Testicular Germ Cell Tumors (TGCT), Thyroid carcinoma (THCA), Thymoma  
603 (THYM), Uterine Corpus Endometrial Carcinoma (UCEC), Uterine Carcinosarcoma (UCS), Uveal  
604 Melanoma (UVM)

605 **Declarations**

606 ***Ethics approval and consent to participate***

607 Not applicable.

608 ***Competing interests***

609 The authors declare that they have no competing interests.

610 ***Funding***

611 This work was supported by the National Institute of General Medical Sciences grant GM128636 (NCS).

612 JTL was partially supported by an NIH training grant (NLM; 5T32LM012416) and the UVA Cancer Center.

613 JPS was partially supported by an NIH training grant (5T32GM813633). FEG-B was supported by the UVA

614 Cancer Center through the NCI Cancer Center Support Grant P30 CA44579 and a V-foundation scholar

615 grant (V2017-013).

616 ***Authors' contributions***

617 JTL led the software development with contributions from JPS and NCS. JTL, FEG-B, and NCS contributed

618 to the writing of the manuscript. FEG-B, SB, and NCS contributed technical expertise. All authors

619 approved the final manuscript.

620 ***Acknowledgements***

621 The results published here are in part based upon data generated by the TCGA Research Network:

622 <https://www.cancer.gov/tcga>.

623 ***Availability of Data and Materials***

624 Information on the source of public data can be found in the corresponding Methods section. The R

625 scripts used for this analysis can be accessed at [https://github.com/databio/COCOA\\_paper](https://github.com/databio/COCOA_paper). The COCOA

626 package can be accessed at <http://bioconductor.org/packages/COCOA>.

627

628

## 629 **Supplementary file 1: Supplementary Methods and Information**

### 630 **The power of covariation in analysis of epigenetic heterogeneity**

631 Covariation of the epigenetic signal in different regions is an important principle in epigenetic analysis  
632 but is not fully taken advantage of by many epigenetic analysis methods. There are two common  
633 limitations of analysis methods. First, relying on differential signals between discrete sample groups  
634 loses information about the differences among samples within a group. For instance, in a health-related  
635 differential analysis, patients in the “disease” group are considered equal for the analysis when there  
636 may actually be differences between patients in the severity of their disease. Although some variation  
637 can be effectively summarized by discrete groups, in some cases, it is often more appropriate to  
638 consider variation along a continuous spectrum<sup>[64]</sup>. Using a continuous spectrum for samples based on  
639 physical or molecular phenotype instead of discrete groups could provide greater resolution for  
640 identifying epigenetic features that covary with sample status. Second, the use of discrete cutoffs for  
641 identifying significant epigenetic differences between samples loses information about the strength of  
642 covariation between epigenetic features and sample status. For example, epigenetic differences  
643 between samples are often determined using a discrete threshold that places epigenetic features into  
644 two groups – significantly different or not significantly different – as is done when finding differentially  
645 methylated or differentially accessible regions. Then the significant regions can be annotated with  
646 reference region sets through region set enrichment testing to aid interpretation<sup>[1, 8, 65-68]</sup>. However,  
647 while this is a flexible approach, converting continuous epigenetic signals to a binary classification --  
648 significant or not significant -- results in the loss of covariation information that could be valuable for the  
649 region set enrichment analysis. This choice is a trade-off between the computational efficiency that  
650 comes from a simplified representation of the epigenetic signal and the potential gains that could come  
651 from having higher resolution data and most region set enrichment tools choose the simpler approach.

### 652 **Selection of immune cell-specific ATAC-seq region sets**

653 We retrieved an ATAC-seq count matrix (GSE74912\_ATACseq\_All\_Counts.txt.gz) from Gene Expression  
654 Omnibus with hematopoietic ATAC-seq data from Corces et al.<sup>[69]</sup>. We normalized each sample with  
655 quantile normalization first then GC normalization with the `cqn` R package<sup>[70]</sup>, according to the  
656 normalization done by Corces et al.<sup>[69]</sup>. When there were multiple samples of a given cell type from a  
657 single individual, we calculated the mean of each region to combine them into a consensus count vector.  
658 From the counts for a given cell type from various individuals, we calculated the mean in each region to

659 create a consensus set of counts for that cell type. To get custom hematopoietic region sets, we did a  
660 series of comparisons between cell type count profiles to determine regions that were open in one or a  
661 specific group of cell types and closed in another cell type or group of cell types. We counted regions as  
662 specific when they were in the top 10% of regions in the chosen cell type/s and in the bottom 50% of the  
663 other compared cell type/s. The code for creating these region sets is available in the 0-  
664 ClusterHemaATAC.R file.

#### 665 **Creation of simulated data**

666 To create simulated data to test COCOA, we first calculated an aggregate healthy DNA methylation  
667 profile by averaging the DNA methylation profiles of 160 TCGA healthy kidney samples. To get a true  
668 positive region set, we selected an arbitrary region set (ER) and set the DNA methylation of all CpGs that  
669 overlapped that region set to zero in the healthy sample. For our analysis, we used 10 replicates of the  
670 healthy sample. We created 10 artificial disease samples by changing the DNA methylation of the CpGs  
671 in the region set of interest to between 0.0125 and 0.25, depending on the sample, with all CpGs in a  
672 given sample being assigned the same DNA methylation level. This results in covariation of the DNA  
673 methylation level of CpGs in the region of interest across samples and in differential methylation  
674 between healthy and disease samples. Finally, we added Gaussian noise to each CpG for each sample to  
675 create variation between samples, keeping methylation in the 0-1 range. We created two sample sets  
676 with different noise levels: low noise ( $\mu=0$ ,  $\text{sd}=0.025$ ) and high noise ( $\mu=0$ ,  $\text{sd}=0.05$ ).

677 To create region sets with a range of p-values, we made a set of region sets that had varied proportions  
678 of true positive regions and random loci sampled from the simulated data DNA methylation coordinates.  
679 Each random locus was expanded from the center to be 500 bp. To assign p-values to the region sets,  
680 we performed PCA on the high noise simulated data then ran COCOA on PC1 and PC2 with our region  
681 sets as the region set database. We calculated 100,000 permutations to determine empirical p-values  
682 for each region set. For further analysis in gamma approximation simulations, we selected region sets  
683 with empirical p-values across a range of orders of magnitude.

#### 684 **How to choose a method for quantifying variation**

685 The choice of method for quantifying variation depends on the data and how well that method can  
686 prioritize features that covary with each other or with a sample phenotype of interest. The decision to  
687 use covariation or correlation depends on whether the epigenetic data is proportion-based, such as for

688 bisulfite sequencing, or count-based and unbounded, such as for ATAC-seq. This decision is not expected  
689 to greatly affect the analysis but using correlation might give greater weight to epigenetic features with  
690 very small absolute changes across samples that actually represent noise and not real signal. Using  
691 covariation may be better for proportion-based data, such as for bisulfite sequencing, and correlation  
692 may be better for count-based data, such as for ATAC-seq. Since the concept of COCOA is based on the  
693 covariation of epigenetic features across samples, COCOA will work best with methods that prioritize  
694 covarying/correlated features and do not give lower scores or coefficients to correlated features. For  
695 instance, a simple regression gives coefficients to input variables based on their association with a  
696 dependent variable. However, if two input variables are correlated, regression will give a lower  
697 coefficient to one of two variables. PCA, on the other hand, can give a high loading value to both  
698 correlated variables. An assumption of our method is that a single regulatory signal will be related to  
699 multiple regions that are regulated in a coordinated way and therefore covary across samples. For  
700 example, we would expect that the epigenetic signal in cell type-specific regions would covary across  
701 samples depending on how much of each sample corresponded to that cell type. Therefore, we expect  
702 that COCOA would work best with methods that do not lower the coefficients or scores of variables that  
703 covary. While we generally used linear metrics for quantifying variation in this study, we expect that  
704 nonlinear metrics such as feature importance scores from machine learning models would also work for  
705 quantifying epigenetic variation if they meet the criteria described above.

706 Some readers may notice that we use covariation or correlation instead of simply using the PCA loadings  
707 as feature contribution scores for unsupervised COCOA. Since the principal component loadings also  
708 represent the contribution of each feature to the respective principal component, we could have used  
709 those as the feature scores. However, this would have required us to recompute the PCA for each  
710 COCOA permutation to get new loadings. Instead, for each permutation, we shuffle the PC scores and  
711 calculate the covariance or correlation between the shuffled PC scores and the epigenetic data. This  
712 allows us to get new feature scores for each permutation without recalculating the PCA for every  
713 permutation, which would be computationally expensive.

#### 714 **Gamma distribution p-value approximation**

715 We used simulated data to compare empirical p-values from COCOA to the p-values derived from a  
716 gamma approximation. As mentioned earlier, we created simulated DNA methylation data with  
717 variation in the regions of a specific region set. We also created a collection of region sets that had

718 varied similarity to the true positive region set and calculated their empirical p-values with 100,000  
719 permutations of COCOA. To evaluate the accuracy of the gamma distribution approximation, we  
720 subsampled from the 100,000 permutations and used the subsampled COCOA runs to create gamma p-  
721 values. We did this for three subsample sizes: 300, 1000, and 10,000. For each subsample size, we  
722 sampled 500,000 times, calculating the gamma p-values each time. As seen in Fig. S12, the median  
723 gamma p-value is fairly close for high p-values but tends to be lower than the empirical p-values as the  
724 p-value decreases. Increasing the number of permutations from 300 to 10,000 reduced the variance of  
725 the gamma p-values but did not cause them to converge to the empirical p-values (Fig. S12). Because of  
726 this, we recommend caution when interpreting gamma p-values, with the reminder that it is an  
727 approximation. The main benefit of the gamma p-value approximation is to screen out region sets that  
728 are not significant, which are the region sets whose p-values fall in the range where the gamma p-value  
729 approximation is more accurate.

### 730 **Considerations when choosing a region set database**

731 The choice of region set database depends partially on the goals of the analysis but a broad database  
732 with region sets from a variety of transcription factors and cell types should be sufficient for most  
733 exploratory analyses. Along those lines, the region sets we used from ENCODE, Roadmap Epigenomics,  
734 and other sources provide a reasonably broad sampling of transcription factors and histone modification  
735 regions for a variety of cell lines and tissue types. However, any similar source of region sets could be  
736 used. The curation of region set databases is an active research area. Additionally, new region sets are  
737 continually being made available to the public. The user would benefit from any source of region sets  
738 that is relevant to their experimental question. This includes region sets derived from a cell or tissue  
739 type that is similar to the samples being studied, especially because transcription factor binding and  
740 many epigenetic marks including DNA methylation can be cell type-specific. If the user is asking a very  
741 targeted question about a specific transcription factor or cell type, the user may want to find a  
742 published region set through a source such as the Gene Expression Omnibus and use that region set  
743 alongside a broader region set database. While the database we used is not comprehensive, it is a rich  
744 starting point that can be expanded in the future.

745

746

747 **Other COCOA parameters**

748 ***Absolute value of FCS***

749 After generating the feature contribution scores (FCS), the COCOA user has the option of taking the  
750 absolute value of those scores before scoring the region sets. This choice depends on whether all  
751 regions in a region set are expected to be regulated in the same way or not (i.e. all regions activated/all  
752 regions repressed or some regions activated and some regions repressed). For cases where regions in a  
753 region set are regulated in the same direction (all activated or all repressed), it would be better to not  
754 take the absolute value. Since the FCS for important regions should all have the same sign in this case,  
755 the relevant signal will be preserved during the COCOA aggregation step while the noise from irrelevant  
756 epigenetic features, which should have arbitrary FCS signs, will cancel out. For example, a TF might  
757 activate all regions where it binds and we would expect that the epigenetic signal in these regions would  
758 generally change in the same direction and have FCS with the same sign. For cases where regions in a  
759 region set are regulated in opposite directions (some activated and some repressed), the absolute value  
760 should be taken. Since the relevant signal may have some positive and some negative FCS, aggregating  
761 FCS without taking the absolute value would partially cancel out and diminish the signal. For example, a  
762 TF might activate some regions but repress others depending on what other proteins are binding with it  
763 at a given region. In this case, the epigenetic signal in regions bound by the TF might change in opposite  
764 directions, leading to FCS with opposite signs. When taking the absolute value, it is still possible to  
765 identify region sets where regions all change in the same direction. However, FCS that represent noise  
766 will not cancel out, potentially reducing the ability to discriminate between true signal and noise. In this  
767 study, we took the absolute value of the FCS when running COCOA since there may have been some  
768 region sets in our database with regions that are regulated in opposite directions.

769 ***Scoring based on mean versus median***

770 COCOA offers the option to score based on the median region set FCS instead of the mean FCS. To  
771 compare the median scoring method to the mean scoring method which was used in the main text, we  
772 performed COCOA with the median scoring method on the TCGA breast cancer DNA methylation data.  
773 We see that the overall trends are similar, with ER-related region sets found to be highly ranked for PC1  
774 and PC3 and polycomb-related region sets highly ranked for PC4 (Fig. S11A, Additional File 1: Table S14).  
775 Additionally, the meta-region profiles for top region sets from the mean scoring method also have peaks  
776 for the median scoring method (Fig. S11B). Consistent with these observations, the region set scores for

777 the first 4 PCs have very high Spearman correlation between scoring methods, all with at least 0.95  
778 correlation (Fig. S11C).

### 779 **Discussion of EZH2 results in comparison to previous findings**

780 Several trends present in our EZH2/SUZ12-binding region analysis contrast with previous results. First,  
781 we found a significant positive correlation between EZH2-binding region DNA methylation and cancer  
782 stage in testicular germ cell tumors (TGCT), whereas previous studies did not identify an association  
783 between EZH2 expression and cancer stage<sup>[71]</sup> and suggested that EZH2 activity is decreased during  
784 cancer progression<sup>[71]</sup> and in chemotherapy resistance<sup>[72]</sup>. Second, we found a negative correlation  
785 between EZH2-binding region methylation and cancer stage in UVM that trended toward significance  
786 (uncorrected  $p < 0.05$ ) while a previous study suggested that increased expression of EZH2 was positively  
787 associated with higher risk of metastasis<sup>[30]</sup>. Third, our finding that higher DNA methylation in EZH2-  
788 binding regions trended toward significance (uncorrected  $p < 0.05$ ) for association with lower risk of  
789 death in GBM contrasts with reports suggesting that EZH2 expression promotes proliferation and  
790 tumorigenesis in glioblastoma<sup>[73, 74]</sup>. These trends could be due in part to the context-dependent effects  
791 of EZH2<sup>[31, 36, 37]</sup>. Further studies would be valuable to clarify the role of EZH2 in these cancer types.

### 792 **Comparison of COCOA to other region set or covariation-based methods**

793 We are not aware of any other tool designed for DNA methylation data that identifies region sets based  
794 on DNA methylation variation across samples. However, since COCOA is broadly applicable to epigenetic  
795 data, we provide a comparison between COCOA and tools designed for chromatin accessibility data with  
796 which COCOA shares some important concepts. We also compare COCOA to tools that were not  
797 designed for epigenetic data but have some conceptual similarity to COCOA. Finally, we mention a tool  
798 designed for DNA methylation data that has superficial similarity to COCOA but actually performs a very  
799 different function. COCOA is unique in that it provides a class of DNA methylation heterogeneity analysis  
800 that was not previously available but also provides a framework to apply the same method to other  
801 epigenetic data types.

### 802 ***Tools for chromatin accessibility data***

803 ***ChromVAR***. ChromVAR is an R package that quantifies the variability of chromatin accessibility signal in  
804 motif regions or region sets<sup>[2]</sup>. For a given set of motif regions, each sample is given a score for how



805 much it deviates from the expected chromatin accessibility of those motif regions. Each motif region set  
806 is also given a score for how variable it is across samples. ChromVAR has a few major differences from  
807 COCOA. First, as mentioned previously, COCOA works with DNA methylation data or chromatin  
808 accessibility data, while chromVAR was designed for chromatin accessibility data. Second, COCOA can  
809 use multiple metrics to quantify epigenetic variation across samples while chromVAR only uses a single  
810 unsupervised way of quantifying variation (bias-corrected z-score for each sample, region set  
811 combination). Among COCOA's multiple options, COCOA can use PCA to more easily separate and  
812 annotate biological signals. COCOA also supports supervised analysis, adding the ability to do a range of  
813 new analyses not supported by chromVAR. Third, a smaller point, COCOA includes additional data  
814 analysis and visualization functions such as for meta-region profiles to further understand inter-sample  
815 variation. While chromVAR's utility is attested to by the many papers citing it, COCOA adds meaningful  
816 value to the epigenetics field that is not captured by the chromVAR package.

817 **BROCKMAN.** BROCKMAN is a tool designed primarily for single cell chromatin accessibility data that  
818 uses variation in the frequency of k-mers in reads to identify gene regulatory variation across cells<sup>[9]</sup>.  
819 While BROCKMAN and COCOA share some conceptual foundations, specifically that covariation of  
820 regulatory signals across cells or samples can be used to understand gene regulatory differences  
821 between the cells, there are some important differences. First, the BROCKMAN tool is for chromatin  
822 accessibility data, not DNA methylation, while COCOA has a generalized framework that works for both  
823 data types. Second, BROCKMAN aggregates epigenetic signal by category (k-mer) before doing  
824 dimensionality reduction while COCOA first does dimensionality reduction (or other quantification  
825 method) then aggregates epigenetic signal by category (region set). Aggregating before dimensionality  
826 reduction is well suited to single cell data, as has been done for single cell DNA methylation data<sup>[75]</sup>.  
827 However, aggregating epigenetic signal after dimensionality reduction allows more flexibility in  
828 applications and allows genome-wide variability to be captured in a more unbiased way. For example,  
829 COCOA could be used with multi-omic dimensionality reduction as shown in Figure 4 with minimal  
830 changes to the COCOA algorithm. Aggregating signal within region sets first might miss inter-sample  
831 epigenetic variability that is not contained within any tested region sets. COCOA shares some ideas with  
832 BROCKMAN but applies them in a generalized framework that can apply to new epigenetic data types,  
833 including DNA methylation.

834

835 ***Gene-centric methods with conceptual similarity to COCOA***

836 The next three methods have some conceptual overlap with COCOA but are gene-centric rather than  
837 region-centric. As mentioned in the paper introduction, region-based approaches are more appropriate  
838 for epigenetic data, for reasons including that it can be difficult to link epigenetic marks to genes.

839 ***PCGSE***. Principal component gene set enrichment (PCGSE) is a method to annotate principal  
840 components that are derived from gene expression data with gene sets<sup>[10]</sup>. COCOA derived conceptual  
841 foundations from this method but extends them to apply to epigenetic data and region sets. COCOA also  
842 extends beyond PCA to include other analyses including supervised analysis.

843 ***MOGSA***. Multi-omics gene set analysis (MOGSA) uses matrix factorization on multi-omics data from the  
844 same samples to integrate the data and reduce its dimensionality then does gene set analysis<sup>[12]</sup>. This  
845 method is gene-centric and not tailored to epigenetic data. As shown with MOFA in Fig. 4, multi-omics  
846 dimensionality reduction techniques could benefit from including a region-centric method such as  
847 COCOA to annotate the epigenetic component of inter-sample variation in addition to using gene set  
848 analysis

849 ***PathwayPCA***. PathwayPCA can do pathway analysis in a variety of scenarios using supervised PCA and  
850 Adaptive Elastic-net Sparse PCA<sup>[13]</sup>. This method is gene-centric and is focused on pathways. As such, it  
851 has a different focus than COCOA.

852 ***Method for DNA methylation that uses local covariation***

853 ***CoMethDMR***. CoMethDMR is a tool to identify differentially methylated regions (DMRs)<sup>[76]</sup>. To boost  
854 statistical power, coMethDMR takes into account local covariation of DNA methylation within a given  
855 region. Unlike coMethDMR which uses covariation of the epigenetic signal only locally, COCOA uses  
856 covariation of the epigenetic signal on the genome-scale. While coMethDMR and COCOA may have  
857 superficial similarities, their goals are different. The output of coMethDMR is a set of differentially  
858 methylated regions while the output of COCOA is a list of region sets associated with a target variable.

859 ***Comparison of COCOA to chromVAR***

860 We compared COCOA and chromVAR with two main comparisons with the breast cancer ATAC-seq data:  
861 both tools applied with the main database of region sets used for this paper and both tools applied with

862 the curated motif database used in the chromVAR paper. For the first comparison, both methods rank  
863 ER and ER-related region sets highly although COCOA did this to a greater extent (Fig. S9A), perhaps  
864 because the use of PCA for COCOA allowed it to separate epigenetic signals more clearly. The median  
865 rank for ER region sets was 45 for PC1 of COCOA and 607 for chromVAR, with 31 ER region sets in the  
866 database. ChromVAR also did not rank hematopoietic transcription factors highly, as PC2 of COCOA did  
867 (Fig. S9A), but many of the highest scoring region sets for chromVAR were region sets for histone  
868 modifications or chromatin accessibility in immune cells. It is possible that COCOA and chromVAR are  
869 uncovering the same underlying signal but in different ways. For the second comparison, ER motifs were  
870 not ranked highly for PC1 of COCOA or for chromVAR (Fig. S9B), which may be due to differences  
871 between ER motif regions and ER ChIP-seq data, although chromVAR ranked ER motifs higher than  
872 COCOA. The median rank for ER motifs was 1309 for PC1 of COCOA and 216 for chromVAR, with 3 ER  
873 motifs in the database. Both chromVAR and PC1 of COCOA identified FOXA1 as the highest scoring ER-  
874 related motif (Fig. S9B). Both chromVAR and COCOA also identified many other FOX motifs as top results  
875 (Fig. S9C), presumably because of their similarity to FOXA1. Some of chromVAR's highest scoring motifs  
876 were for AP1 components. AP1 colocalizes with ER and may be a tethering factor for ER<sup>[77, 78]</sup>. While PC1  
877 of COCOA does not rank AP1-related motifs highly, PCs 3 and 4 do rank them highly (Fig. S9C). COCOA  
878 did not rank motifs for hematopoietic TFs highly for PC2 as it did for the region sets for hematopoietic  
879 TFs, although some hematopoietic TF motifs do have high scores for PC4 (Fig. S9C), which is more  
880 consistent with the region set results. This may once again be due to the difference between motifs and  
881 ChIP-seq region sets.

882 We observe that both COCOA and chromVAR achieved higher maximum scores for experimental region  
883 sets (Fig. S9A) than for motifs (Fig. S9B, S9C) although this trend could depend on the cutoff for  
884 determining motif matches (default parameters were used). For instance, the COCOA score (average  
885 absolute correlation) for PC1 for the highest ranking and median ER region sets were 0.52 and 0.40  
886 while the scores for the highest ranking and median ER motifs were both 0.33. The chromVAR scores  
887 (standard deviation of samples' z-scores) for the highest ranking and median ER region sets were 47.11  
888 and 28.14 while the scores for the highest ranking and median ER motifs were 14.23 and 13.52. Because  
889 the region set database performed better for both methods, we argue that the results using the region  
890 set database are more relevant for comparing the methods. Overall, our results demonstrate that both  
891 methods can discover relevant biological insights but COCOA can separate biological signals to a greater  
892 extent than chromVAR since COCOA's flexible framework allows the use of PCA.

### 893 **Comparison of COCOA to LOLA**

894 We compared COCOA to a generic region set enrichment method that does not consider covariation,  
895 LOLA<sup>[1]</sup>, which is a previous method associated with our lab. We performed two comparisons of COCOA  
896 and LOLA with simulated data: one in which we added a low level of noise to our samples and one in  
897 which we added a higher level of noise (Fig. S9A). Since LOLA requires a set of regions as input, we used  
898 the bumhunter R package<sup>[79]</sup> to find differentially methylated regions (DMRs) between healthy and  
899 disease samples. Then, we used LOLA to test the DMRs for enrichment against our region set database.  
900 For COCOA, we performed PCA on the simulated samples then identified region sets associated with PC1  
901 and PC2. For the comparison with a low level of noise, both methods were able to identify the region set  
902 of interest (Fig. S9B, Additional file 1: Tables S10, S11). However, with a higher level of noise,  
903 bumhunter did not identify any significant DMRs (FDR < 0.05) and we were therefore unable to run  
904 LOLA (Fig. S9C). In contrast, COCOA was still able to identify the region set of interest as relevant for PC2  
905 (Fig. S9C, Additional file 1: Table S12). In this case, the noise apparently begins to dominate the variation  
906 among samples, and noise is therefore detected in PC1. However, the signal is still present, and is now  
907 detected by COCOA in PC2. Despite the noise, COCOA can still discover the healthy vs disease signal as  
908 relevant in PC2, while the bumhunter + LOLA approach is not able to detect significant differences. This  
909 comparison demonstrates that COCOA can better leverage the covariation of epigenetic signal to  
910 annotate epigenetic variation compared to methods that do not use covariation.

911

912

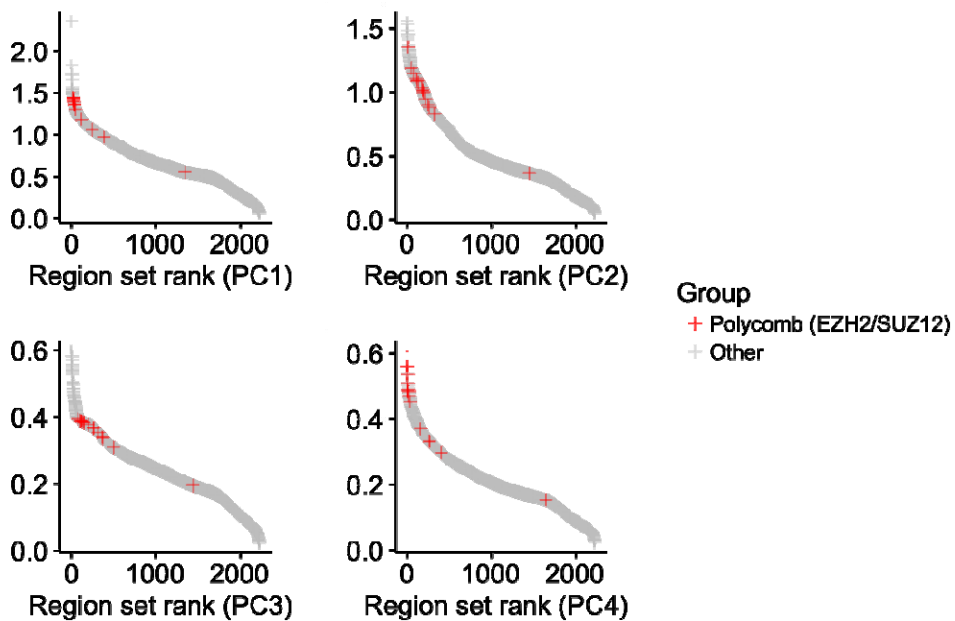

913

914 **Fig. S1. Region set scores for PCs 1-4 for the BRCA DNA methylation data.** This figure is included with

915 only the polycomb group marked to allow clearer visualization of the polycomb region set group in

916 comparison to Fig. 1 where several region set groups are marked.

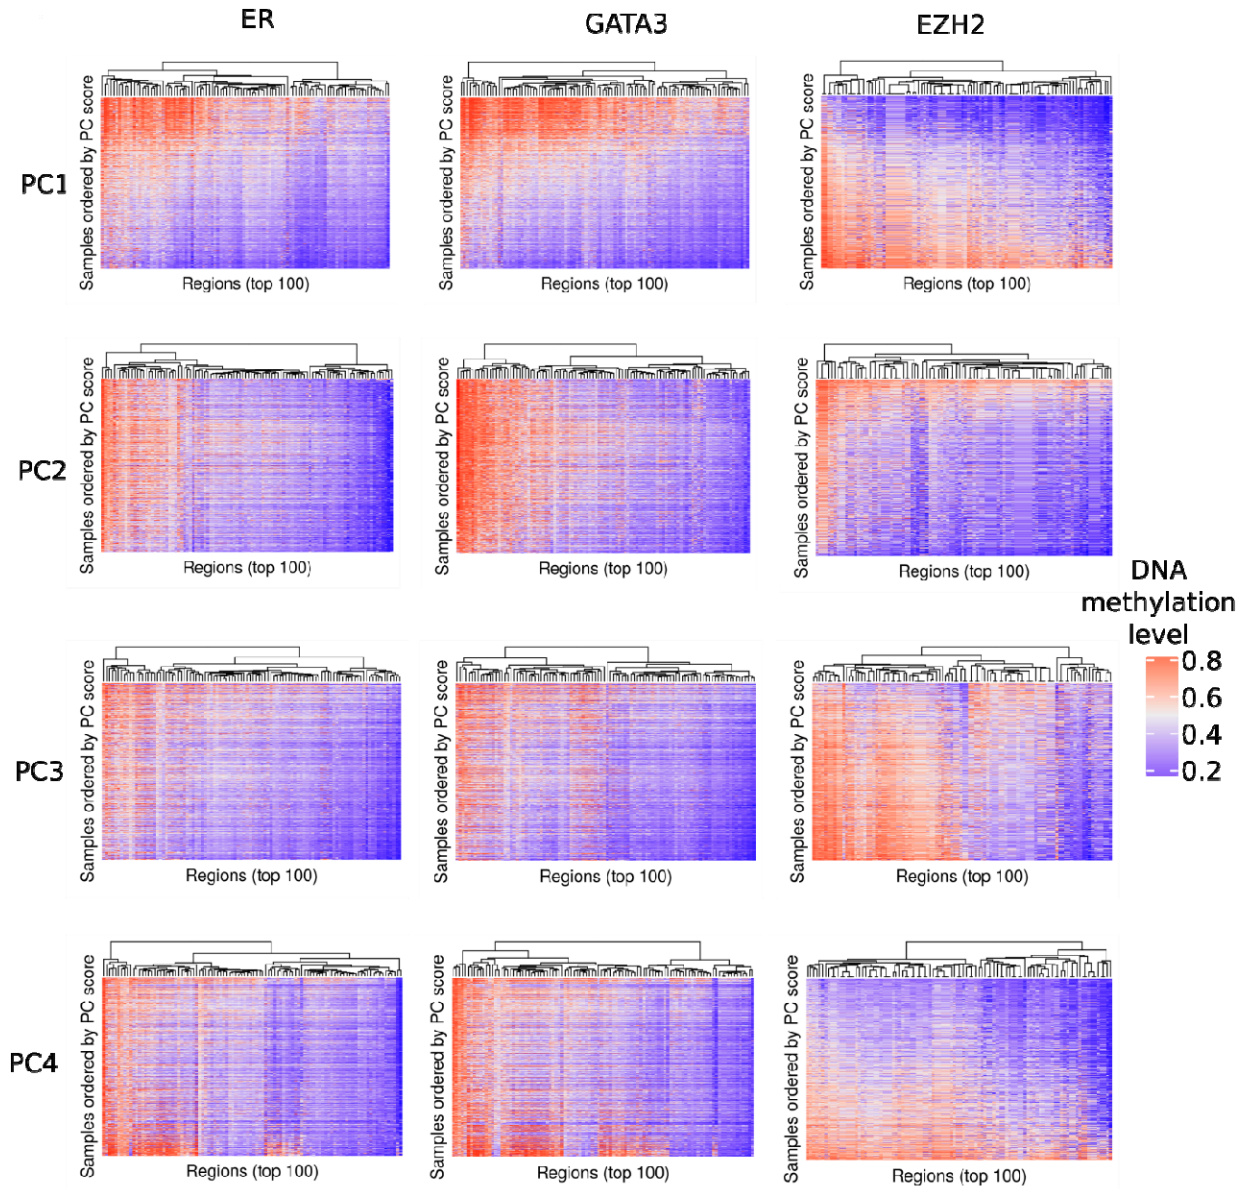

917

918 **Fig. S2. DNA methylation in some of the top scoring region sets for principal component 1.** Average  
919 DNA methylation levels are shown for the 100 regions from each region set that had the highest  
920 absolute FCS for each PC. Patients are ordered by PC scores.

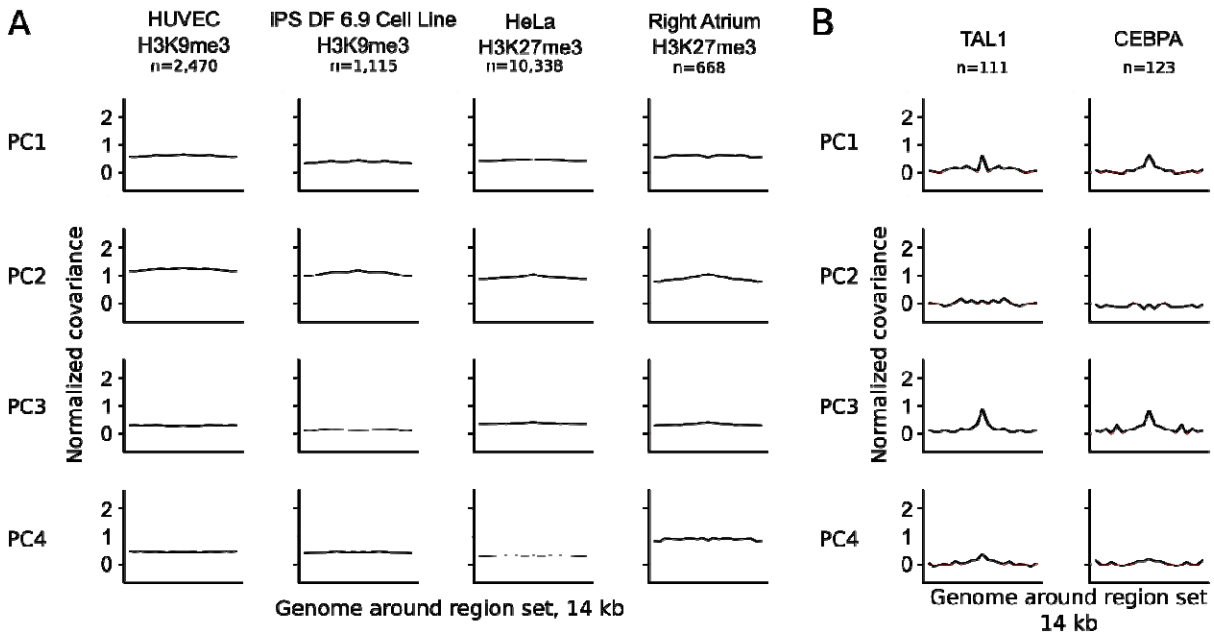

921

922 **Fig. S3. Meta-region profiles for region sets from the COCOA analysis of breast cancer DNA**

923 **methylation data.** A. Profiles for the highest scoring H3K9me3 and H3K27me3 region sets from PC2. B.

924 Profiles for the two highest scoring hematopoietic TFs in PC3. A peak in the center of the meta-region

925 profile indicates that the DNA methylation level covaries with the PC more at the region of interest than

926 in the surrounding genome. Profiles have been normalized to the mean and standard deviation of the

927 covariance of all cytosines for each PC. The number of regions from each region set that were covered

928 by the epigenetic data in the COCOA analysis (Fig. 2, panel A) is indicated by “n”.

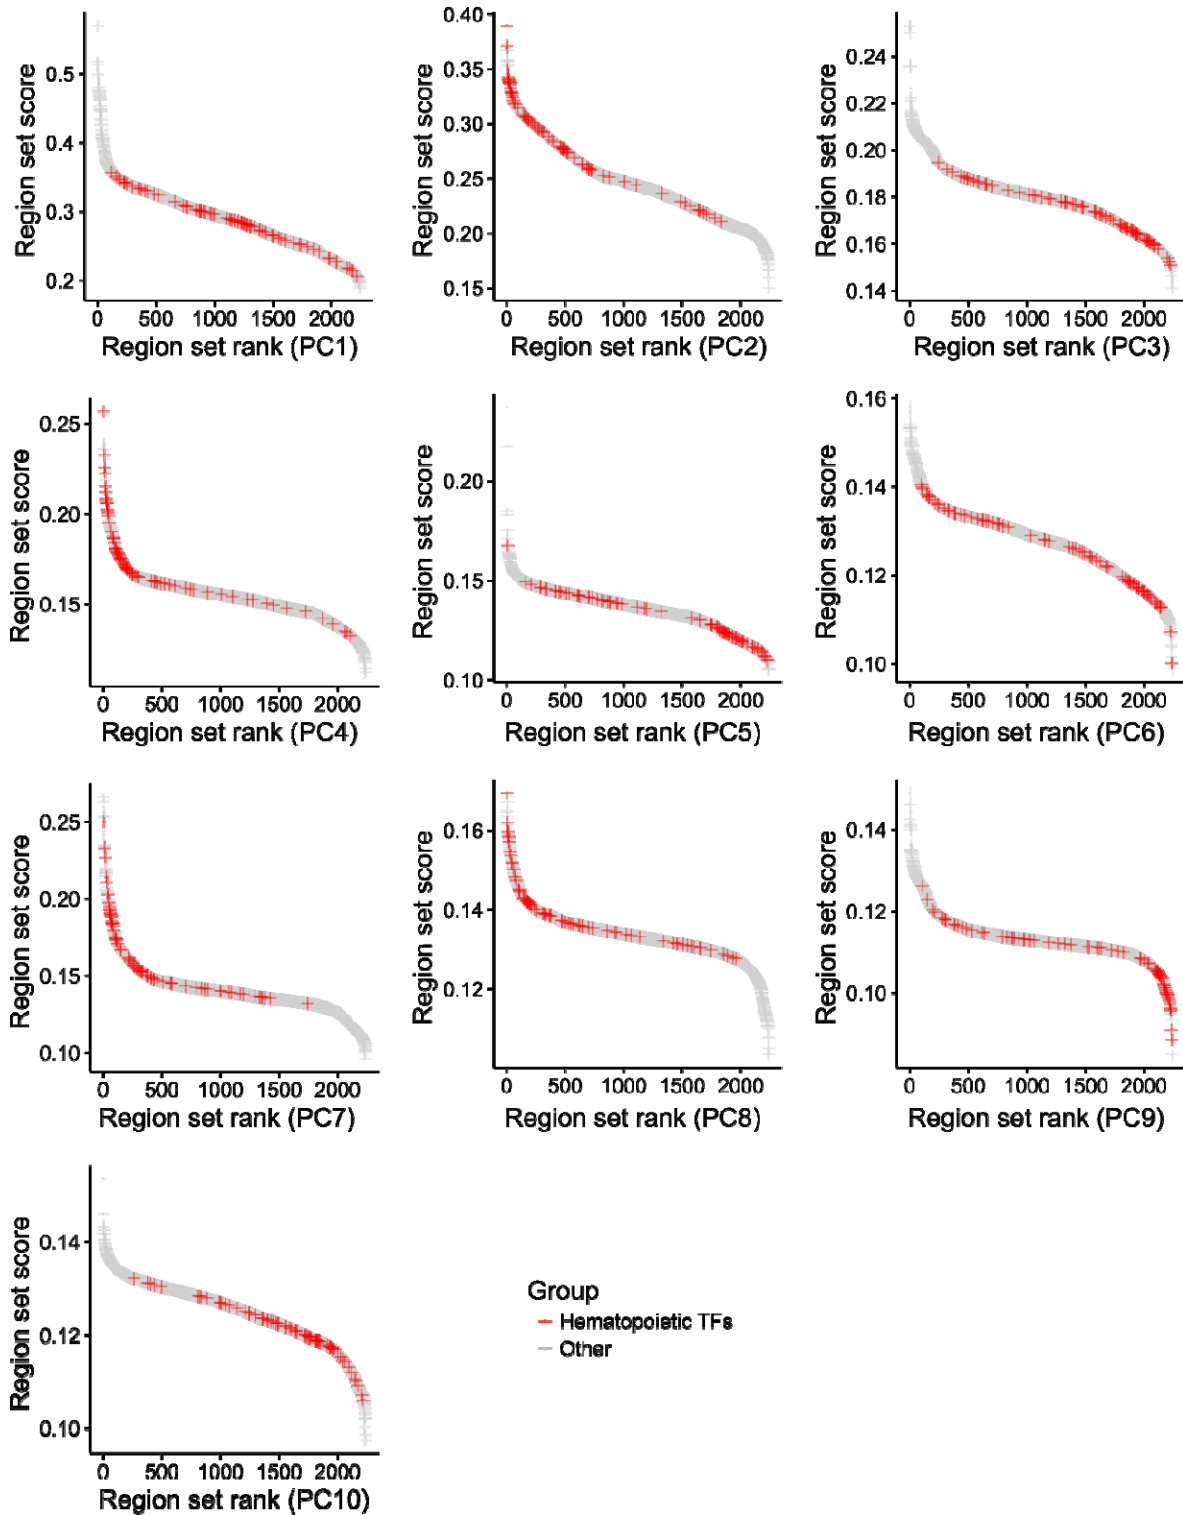

929

930

931

**Fig. S4. Hematopoietic transcription factor region sets have high scores for several of the top principal components.** Region set scores for each of the first 10 principal components of the BRCA ATAC-seq data.



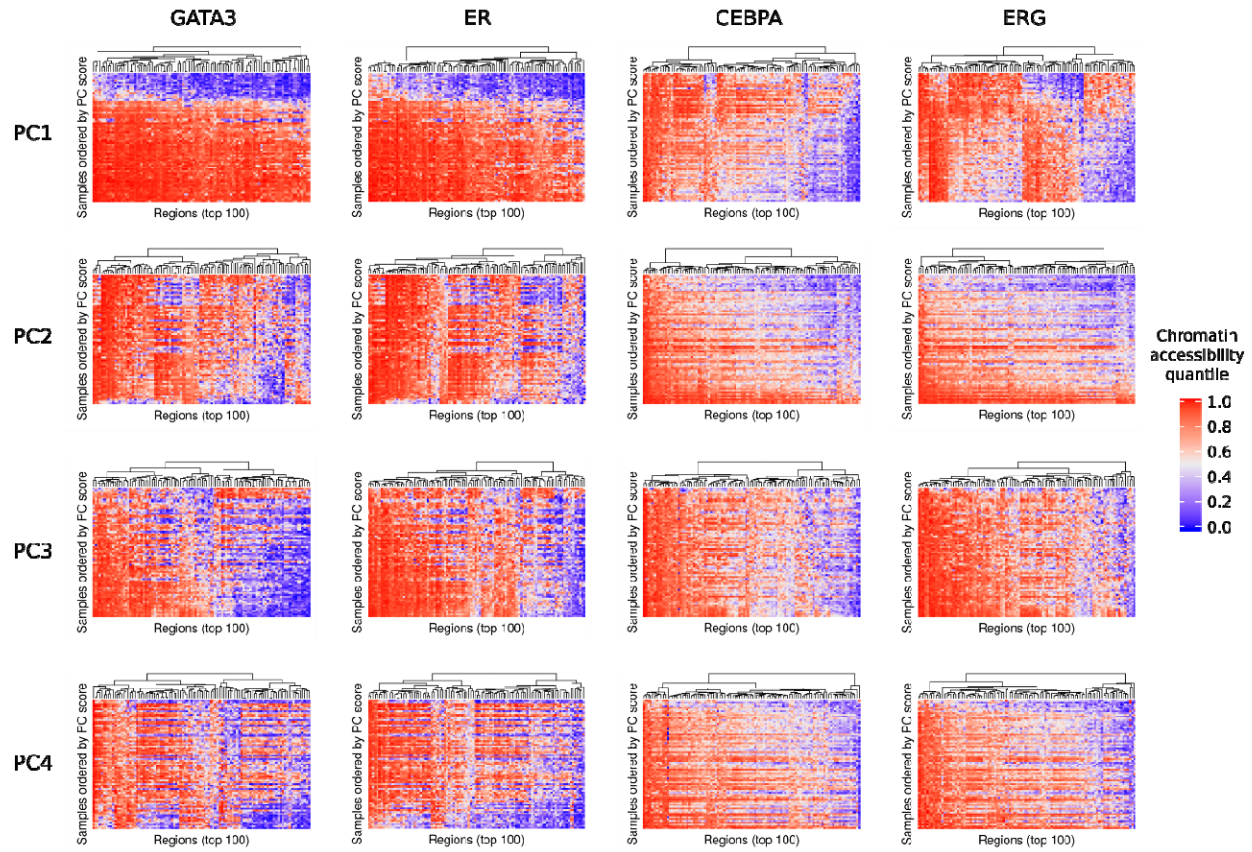

932

933 **Fig. S5. Chromatin accessibility signal in some of the top scoring region sets from COCOA analysis of**  
934 **breast cancer ATAC-seq data. GATA3 and ER were the top scoring region sets for PC1 while CEBPA and**  
935 **ERG were the top scoring region sets for PC2. Average chromatin accessibility quantiles are shown for**  
936 **the 100 regions from each region set that had the highest absolute FCS for each PC. Patients are ordered**  
937 **by PC scores.**

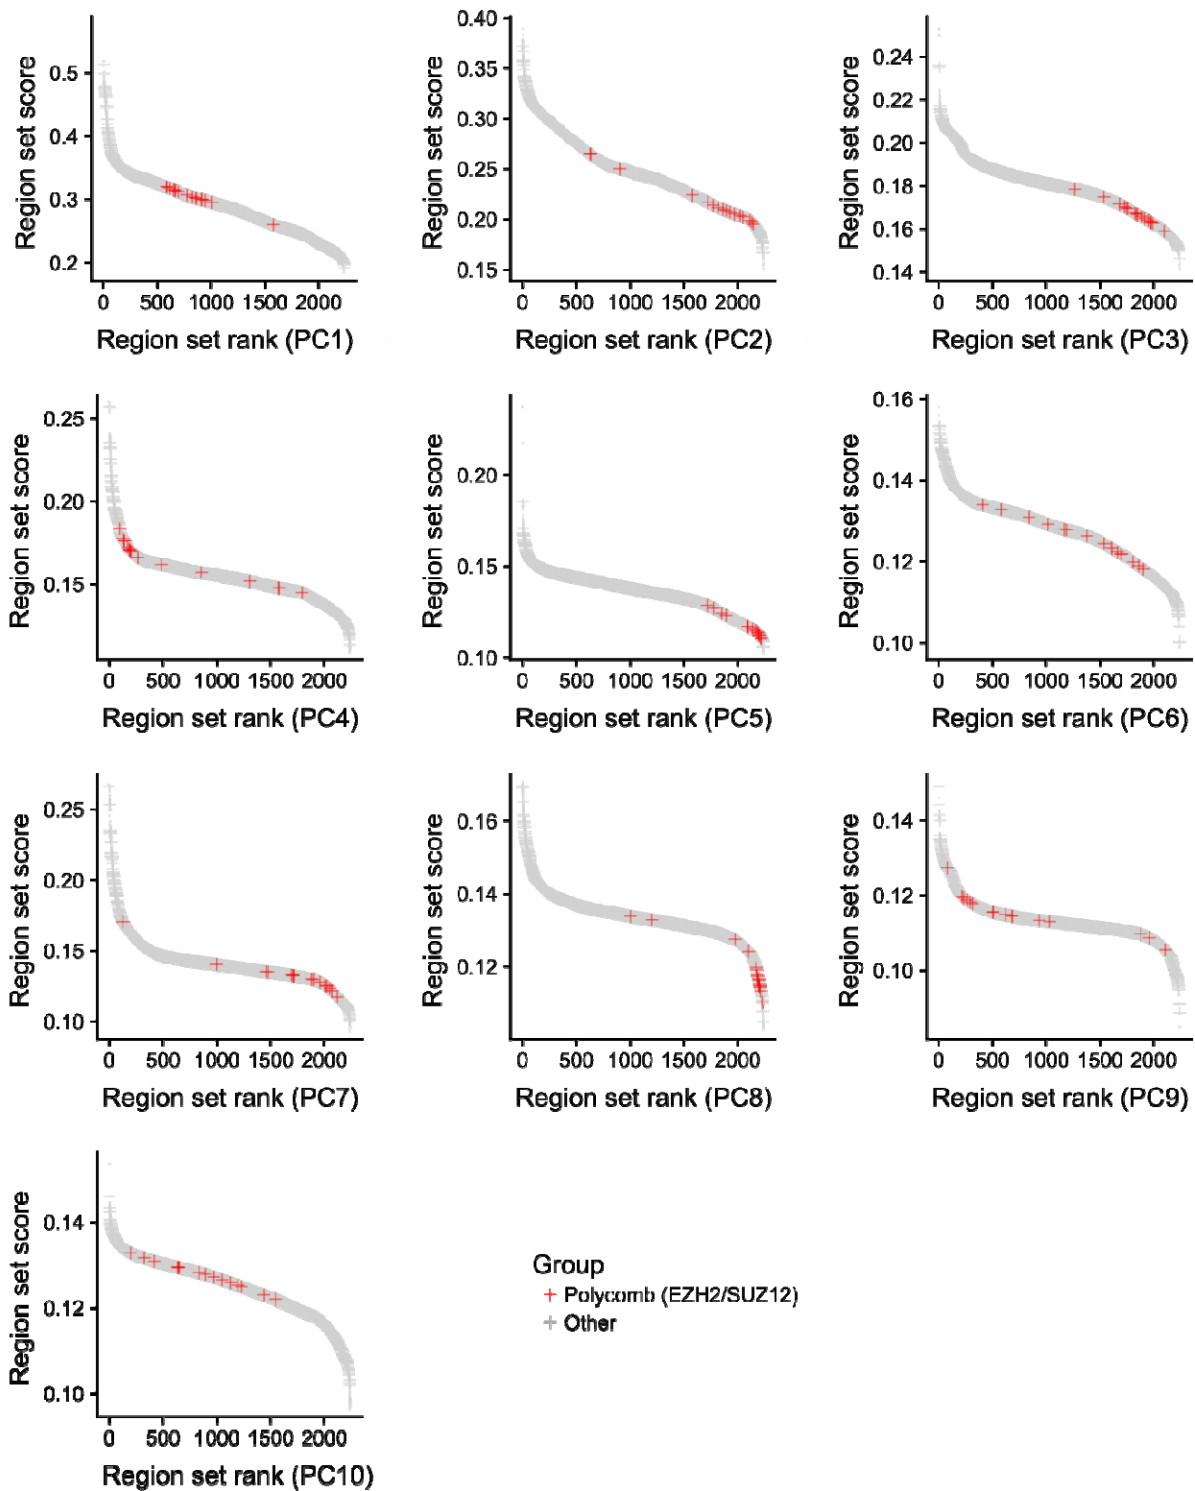

938

939 Fig. S6. Region set scores for each of the first 10 principal components of the BRCA ATAC-seq data,

940 with polycomb region sets (EZH2/SUZ12-binding regions) indicated.

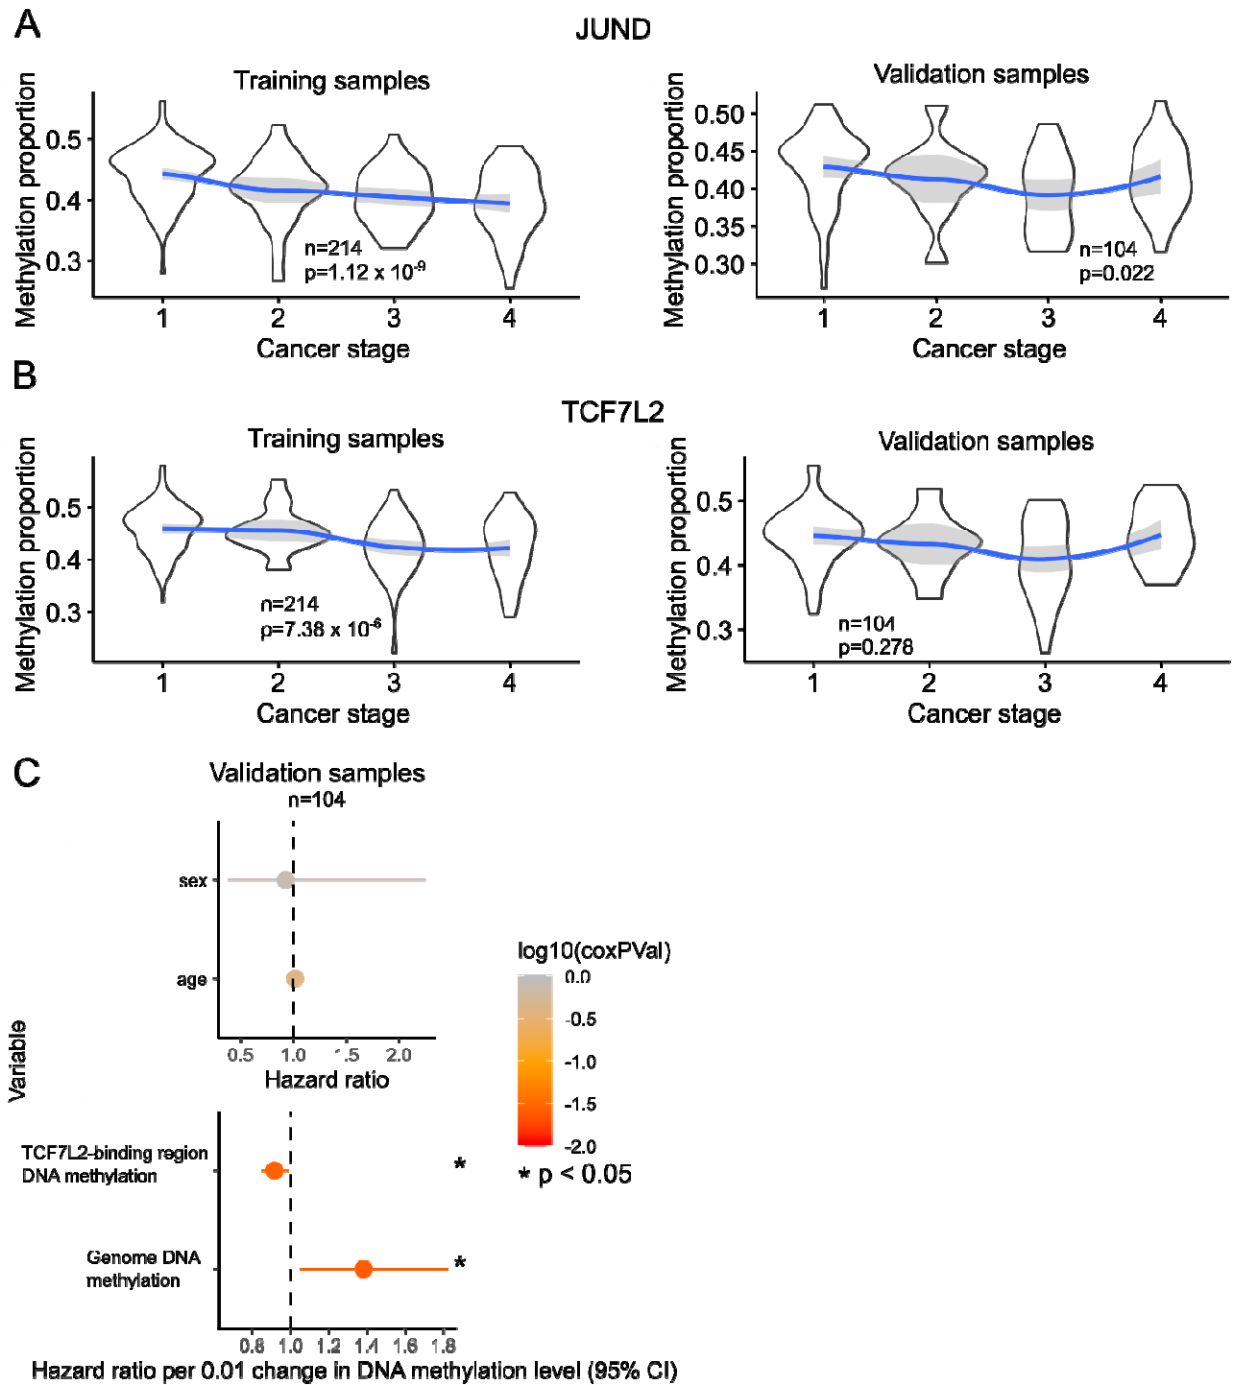

941

942 **Fig. S7. Association of average DNA methylation level in JUND and TCF7L2-binding regions with KIRC**  
 943 **cancer stage and overall survival.** A. The Spearman correlation of cancer stage with the average DNA  
 944 methylation in JUND-binding regions. The JUND region set used is the highest scoring transcription  
 945 factor region set from the KIRC COCOA analysis. The JUND Cox proportional hazards model did not meet  
 946 the proportional hazards assumption and is therefore not included in the figure. B. The Spearman

947 correlation of cancer stage with the average DNA methylation in TCF7L2-binding regions. The TCF7L2  
948 region set used is the second highest scoring transcription factor region set from the KIRC COCOA  
949 analysis. C. Hazard ratios for Cox proportional hazards model of the association between overall patient  
950 survival and average DNA methylation in TCF7L2-binding regions.

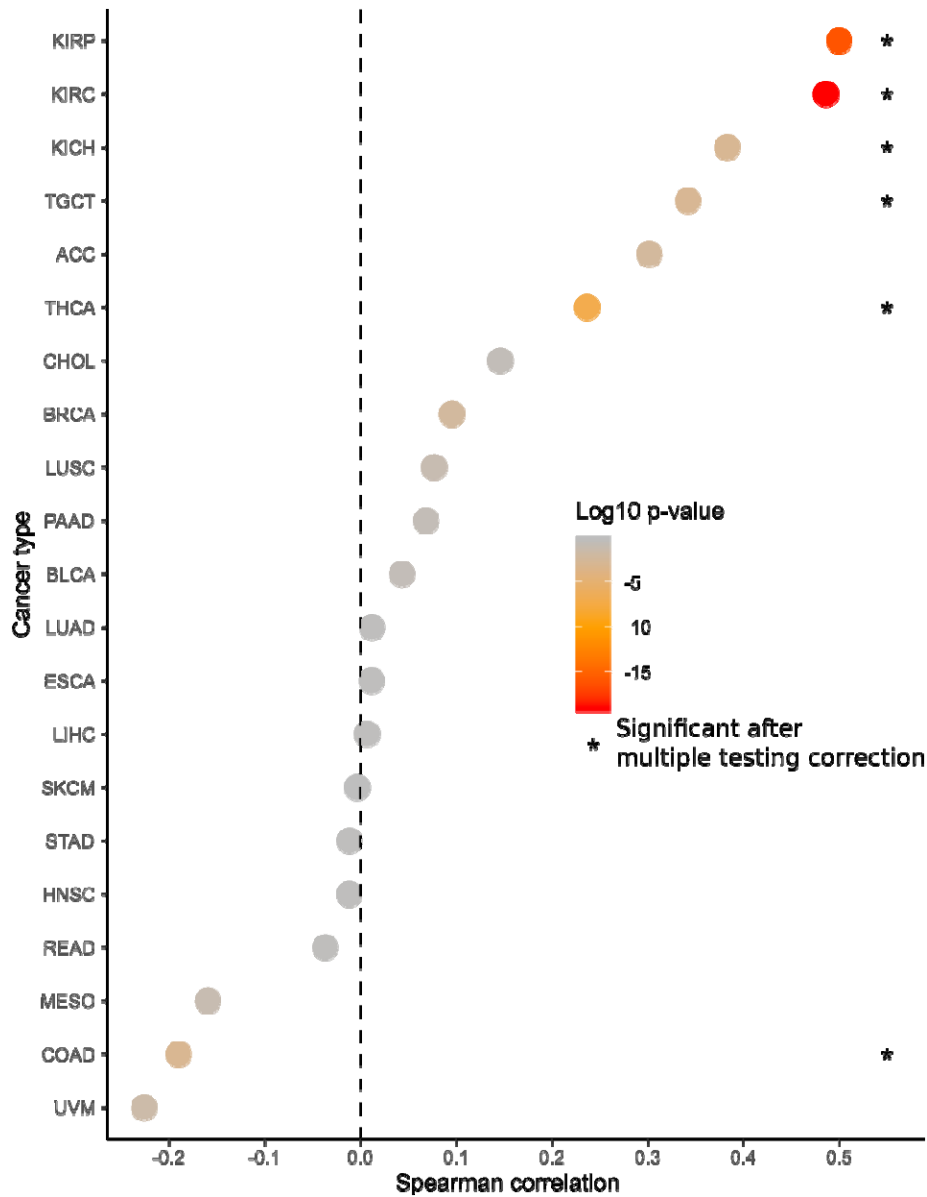

951

952 **Fig. S8. Correlation between average EZH2/SUZ12-binding region DNA methylation and cancer stage.**

953 Color is based on the raw Spearman p-values and asterisks mark significant correlations after Holm-

954 Bonferroni correction to account for testing 21 cancer types.

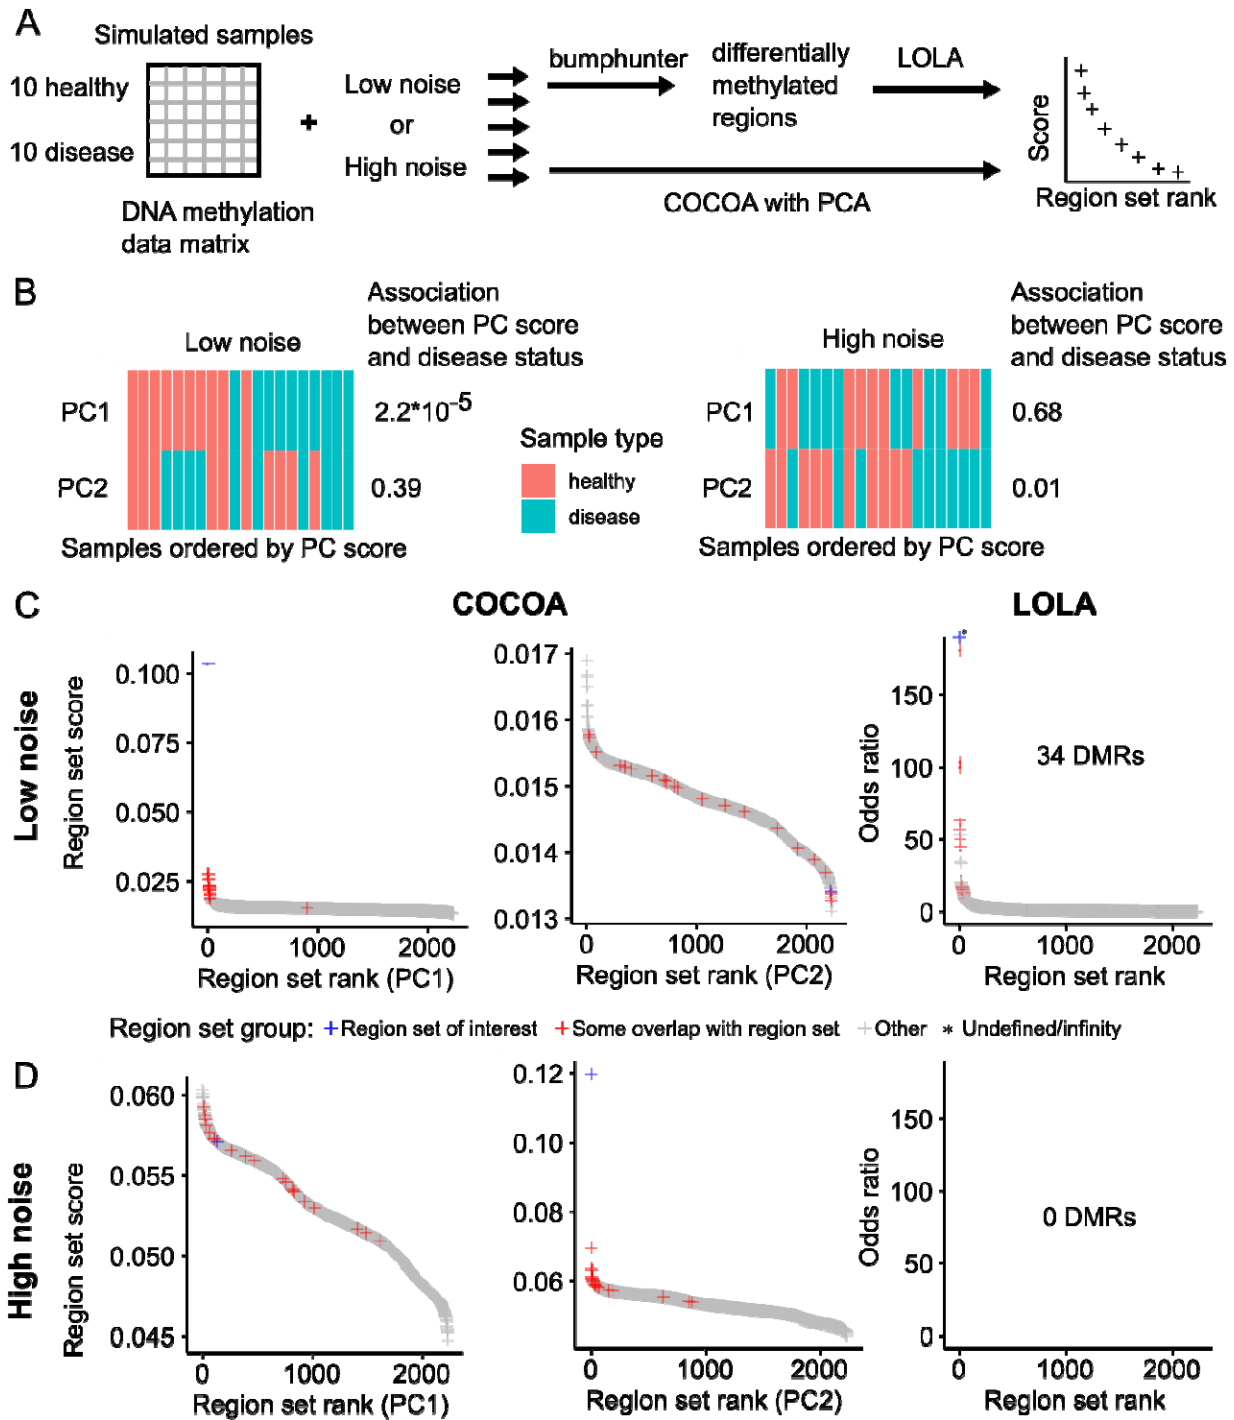

955

956 **Figure S9. Comparison of COCOA and LOLA.** A. The workflow for comparison of the methods. B.  
 957 Association of PC scores with disease status. For low noise, PC1 is associated with disease status but for  
 958 high noise, PC2 is associated with disease status (Wilcoxon rank-sum test). C. Results with a low level of  
 959 noise added to samples. The COCOA score or LOLA odds ratio for each region set, ordered from highest

960 to lowest. C. Results with a high level of noise added to samples. The COCOA score or LOLA odds ratio  
961 for each region set, ordered from highest to lowest. There are no scores for LOLA because bumhunter  
962 did not identify any significant DMRs (FDR  $\leq$  0.05).

963

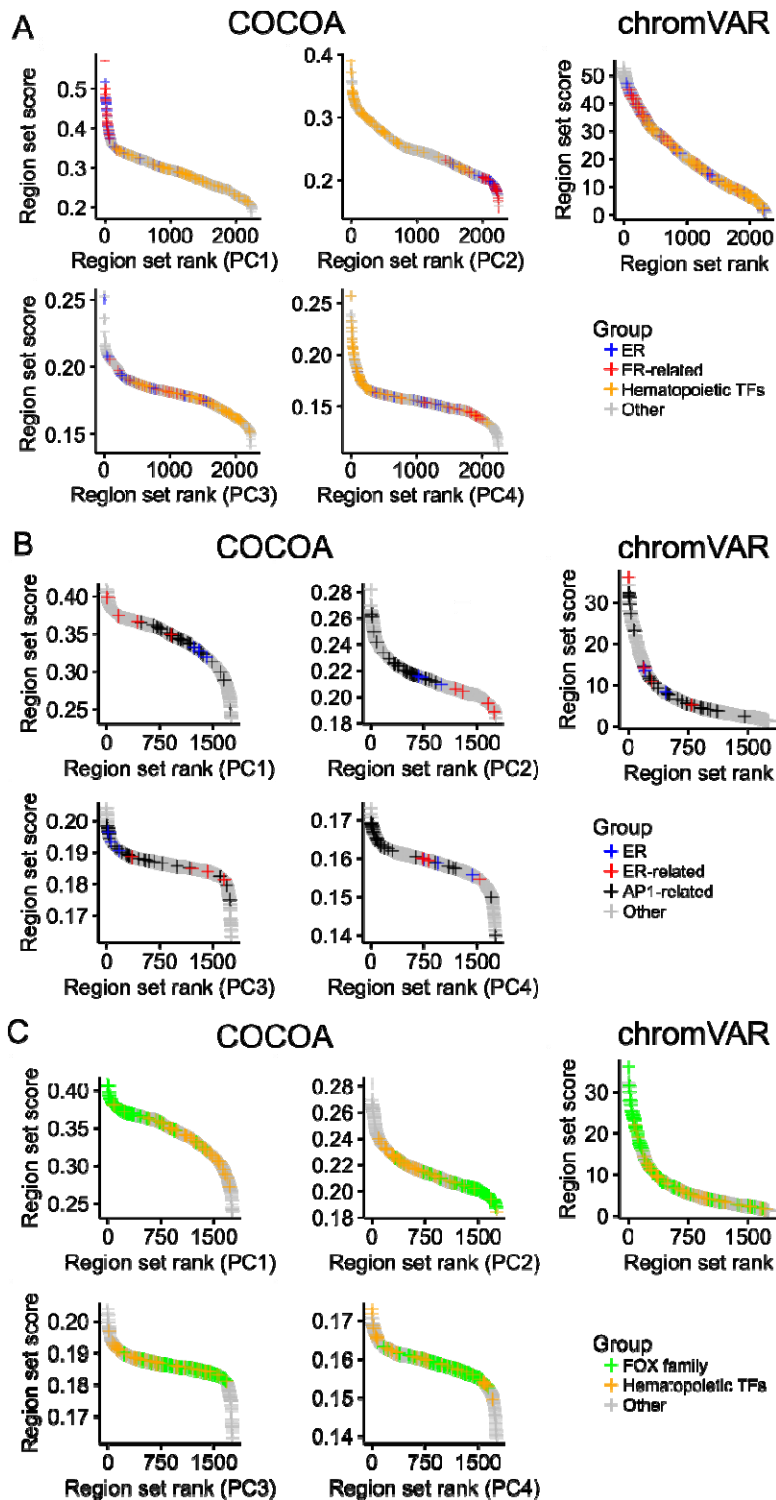

964

965 **Fig. S10. Comparison of COCOA and chromVAR on breast cancer ATAC-seq data.** A. COCOA and  
966 chromVAR scores for the region set database (see “Region set database” in methods). The chromVAR  
967 score for a region set is the standard deviation of all samples’ chromatin accessibility z-scores for that

968 region set. The ER-related region set group includes FOXA1, GATA3, and H3R17me2. For definition of the  
969 hematopoietic TF group, see “Region set database” in methods. B. COCOA and chromVAR scores for a  
970 curated version of the cisBP motif database. The ER-related region set group includes FOXA1 and  
971 GATA3. For the definition of the AP1-related group, see “Comparison of COCOA and chromVAR” in  
972 methods. C. The same COCOA and chromVAR scores for a curated version of the cisBP motif database  
973 but indicating FOX family motifs and hematopoietic TF motifs.



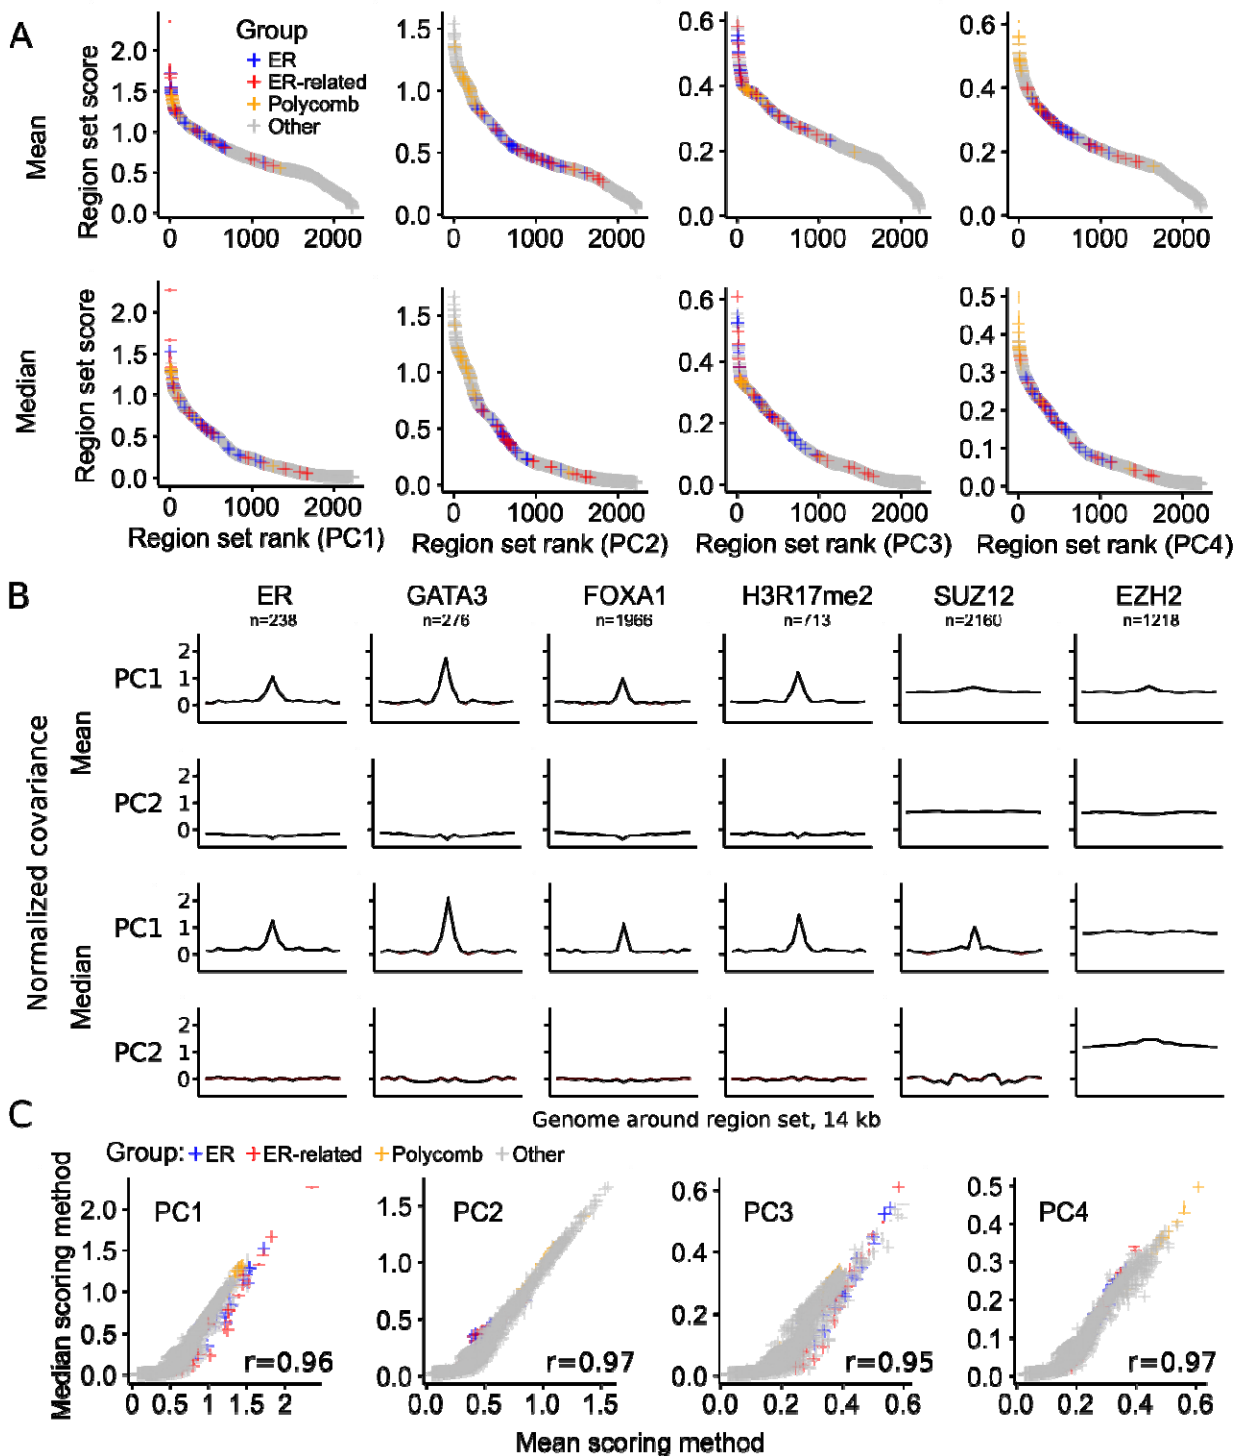

974

975 **Figure S11. Comparison of median and mean scoring methods.** A. The COCOA score for each region set,  
 976 ordered from highest to lowest. The ER-related group includes GATA3, FOXA1, and H3R17me2. The  
 977 polycomb group includes EZH2 and SUZ12. B. Meta-region profiles of several of the highest scoring

978 region sets from the breast cancer analysis. Meta-region profiles show covariance between PC scores  
979 and the epigenetic signal in regions of the region set, centered on the regions of interest. The number of  
980 regions from each region set that were covered by the epigenetic data in the COCOA analysis (panel A) is  
981 indicated by “n”. The line at zero marks the mean or median respectively of the FCS for each PC. C. The  
982 relationship between region set scores for each scoring method. The Spearman correlation is shown.

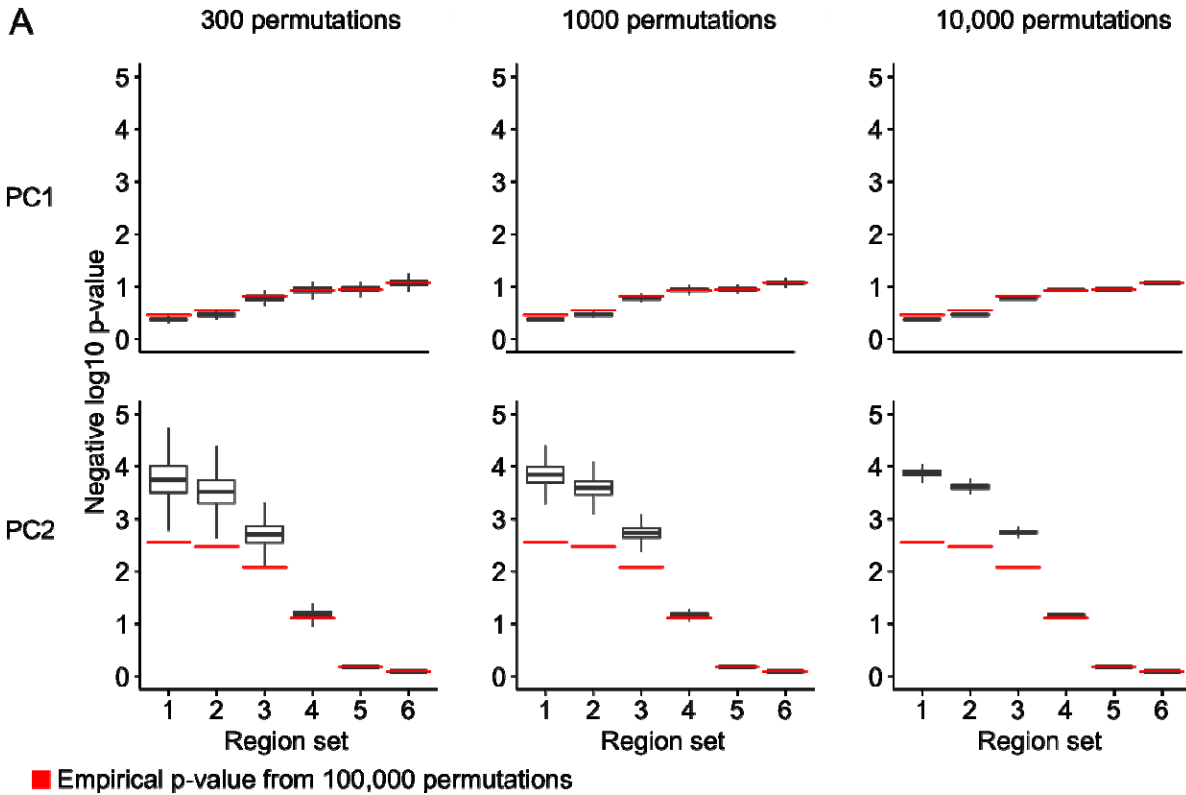

983

984 **Figure S12. Comparison of empirical p-values to gamma distribution p-value approximation.** COCOA  
985 was run on PC1 and PC2 of PCA of simulated data with six region sets. The empirical p-values from  
986 100,000 permutations are shown. P-values were also calculated with a gamma distribution  
987 approximation after sampling either 300, 1000, or 10,000 permutations from the 100,000 that were  
988 calculated. 500,000 such samples were taken to get a distribution of gamma p-values for each region set  
989 (outliers not shown).

990

991

992

993 **References**

- 994 [1] Sheffield NC, Bock C. LOLA: enrichment analysis for genomic region sets and regulatory elements in R and  
995 Bioconductor. *Bioinformatics*. 2015 oct;32(4):587–589.
- 996 [2] Schep AN, Wu B, Buenrostro JD, Greenleaf WJ. chromVAR: inferring transcription-factor-associated  
997 accessibility from single-cell epigenomic data. *Nature Methods*. 2017 aug;14(10):975–978.
- 998 [3] Lawson JT, Tomazou EM, Bock C, Sheffield NC. MIRA: an R package for DNA methylation-based inference  
999 of regulatory activity. *Bioinformatics*. 2018 mar;34(15):2649–2650.
- 1000 [4] McLean CY, Bristor D, Hiller M, Clarke SL, Schaar BT, Lowe CB, et al. GREAT improves functional  
1001 interpretation of cis-regulatory regions. *Nature Biotechnology*. 2010 may;28(5):495–501.
- 1002 [5] Sheffield NC, Thurman RE, Song L, Safi A, Stamatoyannopoulos JA, Lenhard B, et al. Patterns of regulatory  
1003 activity across diverse human cell types predict tissue identity, transcription factor binding, and long-range  
1004 interactions. *Genome Research*. 2013 mar;23(5):777–788.
- 1005 [6] Sheffield NC, Pierron G, Klughammer J, Datlinger P, Schonegger A, Schuster M, et al. DNA methylation  
1006 heterogeneity defines a disease spectrum in Ewing sarcoma. *Nature Medicine*. 2017 jan;23(3):386–395.
- 1007 [7] Dozmorov MG. Epigenomic annotation-based interpretation of genomic data: from enrichment analysis to  
1008 machine learning. *Bioinformatics*. 2017 jun;33(20):3323–3330.
- 1009 [8] Layer RM, Pedersen BS, DiSera T, Marth GT, Gertz J, Quinlan AR. GIGGLE: a search engine for large-scale  
1010 integrated genome analysis. *Nature Methods*. 2018 jan;15(2):123–126.
- 1011 [9] de Boer CG, Regev A. BROCKMAN: deciphering variance in epigenomic regulators by k-mer factorization.  
1012 *BMC Bioinformatics*. 2018 jul;19(1).
- 1013 [10] Frost HR, Li Z, Moore JH. Principal component gene set enrichment (PCGSE). *BioData Mining*. 2015  
1014 jun;8(1).
- 1015 [11] Subramanian A, Tamayo P, Mootha VK, Mukherjee S, Ebert BL, Gillette MA, et al. Gene set enrichment  
1016 analysis: A knowledge-based approach for interpreting genome-wide expression profiles. *Proceedings of the  
1017 National Academy of Sciences*. 2005 sep;102(43):15545–15550.
- 1018 [12] Meng C, Basunia A, Peters B, Gholami AM, Kuster B, Culhane AC. MOGSA: Integrative Single Sample Gene-  
1019 set Analysis of Multiple Omics Data. *Molecular & Cellular Proteomics*. 2019 jun;18(8 suppl 1):S153–S168.
- 1020 [13] Odom GJ, Ban Y, Liu L, Sun X, Pico AR, Zhang B, et al. pathwayPCA: an R package for integrative pathway  
1021 analysis with modern PCA methodology and gene selection. 2019 apr;

- 1022 [14] Ung M, Ma X, Johnson KC, Christensen BC, Cheng C. Effect of estrogen receptor alpha binding on  
1023 functional DNA methylation in breast cancer. *Epigenetics*. 2014 jan;9(4):523–532.
- 1024 [15] Fleischer T, , Tekpli X, Mathelier A, Wang S, Nebdal D, et al. DNA methylation at enhancers identifies  
1025 distinct breast cancer lineages. *Nature Communications*. 2017 nov;8(1).
- 1026 [16] Frieze S, Lupien M, Silver PA, Brown M. CARM1 Regulates Estrogen-Stimulated Breast Cancer Growth  
1027 through Up-regulation of E2F1. *Cancer Research*. 2008 jan;68(1):301–306.
- 1028 [17] Guo S, Li X, Rohr J, Wang Y, Ma S, Chen P, et al. EZH2 overexpression in different immunophenotypes of  
1029 breast carcinoma and association with clinicopathologic features. *Diagnostic Pathology*. 2016 apr;11(1).
- 1030 [18] Holm K, Grabau D, Lovgren K, Aradottir S, Gruvberger-Saal S, Howlin J, et al. Global H3K27 trimethylation  
1031 and EZH2 abundance in breast tumor subtypes. *Molecular Oncology*. 2012 jun;6(5):494–506.
- 1032 [19] Hwang C, Giri VN, Wilkinson JC, Wright CW, Wilkinson AS, Cooney KA, et al. EZH2 regulates the  
1033 transcription of estrogen-responsive genes through association with REA, an estrogen receptor corepressor. *Breast  
1034 Cancer Research and Treatment*. 2007 apr;107(2):235–242.
- 1035 [20] Segovia-Mendoza M, Morales-Montor J. Immune Tumor Microenvironment in Breast Cancer and the  
1036 Participation of Estrogen and Its Receptors in Cancer Physiopathology. *Frontiers in Immunology*. 2019 mar;10.
- 1037 [21] Corces MR, Granja JM, Shams S, Louie BH, Seoane JA, Zhou W, et al. The chromatin accessibility landscape  
1038 of primary human cancers. *Science*. 2018 oct;362(6413):eaav1898.
- 1039 [22] Dietrich S, Oles M, Lu J, Sellner L, Anders S, Velten B, et al. Drug-perturbation-based stratification of blood  
1040 cancer. *Journal of Clinical Investigation*. 2017 dec;128(1):427–445.
- 1041 [23] Argelaguet R, Velten B, Arnol D, Dietrich S, Zenz T, Marioni JC, et al. Multi-Omics Factor Analysis-a  
1042 framework for unsupervised integration of multi-omics data sets. *Molecular Systems Biology*. 2018  
1043 jun;14(6):e8124.
- 1044 [24] Fabbri G, Dalla-Favera R. The molecular pathogenesis of chronic lymphocytic leukaemia. *Nature Reviews  
1045 Cancer*. 2016 feb;16(3):145–162.
- 1046 [25] Takao Y, Yokota T, Koide H.  $\beta$ -Catenin up-regulates Nanog expression through interaction with Oct-3/4 in  
1047 embryonic stem cells. *Biochemical and Biophysical Research Communications*. 2007 feb;353(3):699–705.
- 1048 [26] Faunes F, Hayward P, Descalzo SM, Chatterjee SS, Balayo T, Trott J, et al. A membrane-associated  $\beta$ -  
1049 catenin/Oct4 complex correlates with ground-state pluripotency in mouse embryonic stem cells. *Development*.  
1050 2013 feb;140(6):1171–1183.

- 1051 [27] Ying L, Mills JA, French DL, Gadue P. OCT4 Coordinates with WNT Signaling to Pre-pattern Chromatin at  
1052 the SOX17 Locus during Human ES Cell Differentiation into Definitive Endoderm. *Stem Cell Reports*. 2015  
1053 oct;5(4):490–498.
- 1054 [28] Zhang D, Yang X, Luo Q, Fu D, Li H, Li H, et al. EZH2 enhances the invasive capability of renal cell carcinoma  
1055 cells via activation of STAT3. *Molecular Medicine Reports*. 2017 dec;.
- 1056 [29] Varambally S, Dhanasekaran SM, Zhou M, Barrette TR, Kumar-Sinha C, Sanda MG, et al. The polycomb  
1057 group protein EZH2 is involved in progression of prostate cancer. *Nature*. 2002 oct;419(6907):624–629.
- 1058 [30] Cheng Y, Li Y, Huang X, Wei W, Qu Y. Expression of EZH2 in uveal melanomas patients and associations  
1059 with prognosis. *Oncotarget*. 2017 jul;8(44).
- 1060 [31] Kim KH, Roberts CWM. Targeting EZH2 in cancer. *Nature Medicine*. 2016 feb;22(2):128–134.
- 1061 [32] Bachmann IM, Halvorsen OJ, Collett K, Stefansson IM, Straume O, Haukaas SA, et al. EZH2 Expression Is  
1062 Associated With High Proliferation Rate and Aggressive Tumor Subgroups in Cutaneous Melanoma and Cancers of  
1063 the Endometrium, Prostate, and Breast. *Journal of Clinical Oncology*. 2006 jan;24(2):268–273.
- 1064 [33] Melling N, Thomsen E, Tsourlakis MC, Kluth M, Hube-Magg C, Minner S, et al. Overexpression of enhancer  
1065 of zeste homolog 2 (EZH2) characterizes an aggressive subset of prostate cancers and predicts patient prognosis  
1066 independently from pre- and postoperatively assessed clinicopathological parameters. *Carcinogenesis*. 2015  
1067 sep;36(11):1333–1340.
- 1068 [34] Liu L, Xu Z, Zhong L, Wang H, Jiang S, Long Q, et al. Prognostic Value of EZH2 Expression and Activity in  
1069 Renal Cell Carcinoma: A Prospective Study. *PLoS ONE*. 2013 nov;8(11):e81484.
- 1070 [35] Chen Z, Yang P, Li W, He F, Wei J, Zhang T, et al. Expression of EZH2 is associated with poor outcome in  
1071 colorectal cancer. *Oncology Letters*. 2017 dec;.
- 1072 [36] Wang Y, Hou N, Cheng X, Zhang J, Tan X, Zhang C, et al. Ezh2 Acts as a Tumor Suppressor in Kras-driven  
1073 Lung Adenocarcinoma. *International Journal of Biological Sciences*. 2017;13(5):652–659.
- 1074 [37] Basheer F, Giotopoulos G, Meduri E, Yun H, Mazan M, Sasca D, et al. Contrasting requirements during  
1075 disease evolution identify EZH2 as a therapeutic target in AML. *The Journal of Experimental Medicine*. 2019  
1076 mar;216(4):966–981.
- 1077 [38] Huber W, Carey VJ, Gentleman R, Anders S, Carlson M, Carvalho BS, et al. Orchestrating high-throughput  
1078 genomic analysis with Bioconductor. *Nature Methods*. 2015 jan;12(2):115–121.
- 1079 [39] Consortium EP. An integrated encyclopedia of DNA elements in the human genome. *Nature*. 2012  
1080 sep;489(7414):57–74.

- 1081 [40] Davis CA, Hitz BC, Sloan CA, Chan ET, Davidson JM, Gabdank I, et al. The Encyclopedia of DNA elements  
1082 (ENCODE): data portal update. *Nucleic Acids Research*. 2017 nov;46(D1):D794–D801.
- 1083 [41] Bernstein BE, Stamatoyannopoulos JA, Costello JF, Ren B, Milosavljevic A, Meissner A, et al. The NIH  
1084 Roadmap Epigenomics Mapping Consortium. *Nature Biotechnology*. 2010 oct;28(10):1045–1048.
- 1085 [42] Kundaje A, Meuleman W, Ernst J, Bilenky M, Yen A, et al. Integrative analysis of 111 reference human  
1086 epigenomes. *Nature*. 2015 feb;518(7539):317–330.
- 1087 [43] Winkler AM, Ridgway GR, Douaud G, Nichols TE, Smith SM. Faster permutation inference in brain imaging.  
1088 *NeuroImage*. 2016 nov;141:502–516.
- 1089 [44] Delignette-Muller ML, Dutang C. fitdistrplus: An R Package for Fitting Distributions. *Journal of Statistical*  
1090 *Software*. 2015;64(4).
- 1091 [45] Benjamini Y, Hochberg Y. Controlling the False Discovery Rate: A Practical and Powerful Approach to  
1092 Multiple Testing. *Journal of the Royal Statistical Society: Series B (Methodological)*. 1995 jan;57(1):289–300.
- 1093 [46] Sánchez-Castillo M, Ruau D, Wilkinson AC, Ng FSL, Hannah R, Diamanti E, et al. CODEX: a next-generation  
1094 sequencing experiment database for the haematopoietic and embryonic stem cell communities. *Nucleic Acids*  
1095 *Research*. 2014 sep;43(D1):D1117–D1123.
- 1096 [47] Mei S, Qin Q, Wu Q, Sun H, Zheng R, Zang C, et al. Cistrome Data Browser: a data portal for ChIP-Seq and  
1097 chromatin accessibility data in human and mouse. *Nucleic Acids Research*. 2016 oct;45(D1):D658–D662.
- 1098 [48] Sandelin A. JASPAR: an open-access database for eukaryotic transcription factor binding profiles. *Nucleic*  
1099 *Acids Research*. 2004 jan;32(90001):91D–94.
- 1100 [49] Rosenbauer F, Tenen DG. Transcription factors in myeloid development: balancing differentiation with  
1101 transformation. *Nature Reviews Immunology*. 2007 feb;7(2):105–117.
- 1102 [50] Somasundaram R, Prasad MAJ, Ungerböck J, Sigvardsson M. Transcription factor networks in B-cell  
1103 differentiation link development to acute lymphoid leukemia. *Blood*. 2015 jul;126(2):144–152.
- 1104 [51] Orkin SH. Transcription Factors and Hematopoietic Development. *Journal of Biological Chemistry*. 1995  
1105 mar;270(10):4955–4958.
- 1106 [52] Colaprico A, Silva TC, Olsen C, Garofano L, Cava C, Garolini D, et al. TCGAbiolinks: an R/Bioconductor  
1107 package for integrative analysis of TCGA data. *Nucleic Acids Research*. 2015 dec;44(8):e71–e71.
- 1108 [53] Weirauch MT, Yang A, Albu M, Cote AG, Montenegro-Montero A, Drewe P, et al. Determination and  
1109 Inference of Eukaryotic Transcription Factor Sequence Specificity. *Cell*. 2014 sep;158(6):1431–1443.

- 1110 [54] Schep A. motifmatchr: Fast Motif Matching in R; 2018. R package version 1.4.0.
- 1111 [55] Eferl R, Wagner EF. AP-1: a double-edged sword in tumorigenesis. *Nature Reviews Cancer*. 2003  
1112 nov;3(11):859–868.
- 1113 [56] Bioconductor Package Maintainer <Maintainer@Bioconductor.Org>. ExperimentHub. Bioconductor; 2017.
- 1114 [57] Marcel Ramos LW. curatedTCGAData: Curated Data From The Cancer Genome Atlas (TCGA) as  
1115 MultiAssayExperiment Objects. Bioconductor; 2017.
- 1116 [58] R Core Team. R: A Language and Environment for Statistical Computing. Vienna, Austria; 2018. Available  
1117 from: <https://www.R-project.org/>.
- 1118 [59] Kassambara A, Kosinski M, Biecek P. survminer: Drawing Survival Curves using 'ggplot2'; 2019. R package  
1119 version 0.4.6. Available from: <https://CRAN.R-project.org/package=survminer>.
- 1120 [60] Grambsch PM, Therneau TM. Proportional hazards tests and diagnostics based on weighted residuals.  
1121 *Biometrika*. 1994;81(3):515–526.
- 1122 [61] Therneau TM. A Package for Survival Analysis in S; 2015. Version 2.38. Available from: <https://CRAN.R-project.org/package=survival>.
- 1124 [62] Terry M Therneau, Patricia M Grambsch. *Modeling Survival Data: Extending the Cox Model*. New York:  
1125 Springer; 2000.
- 1126 [63] Holm S. A simple sequentially rejective multiple test procedure. *Scandinavian Journal of Statistics*.  
1127 1979;6(2):65–70.
- 1128 [64] Ma S, Ogino S, Parsana P, Nishihara R, Qian Z, Shen J, et al. Continuity of transcriptomes among colorectal  
1129 cancer subtypes based on meta-analysis. *Genome Biology*. 2018 sep;19(1).
- 1130 [65] Chikina MD, Troyanskaya OG. An effective statistical evaluation of ChIPseq dataset similarity.  
1131 *Bioinformatics*. 2012 jan;28(5):607–613.
- 1132 [66] Breeze CE, Reynolds AP, van Dongen J, Dunham I, Lazar J, Neph S, et al. eFORGE v2.0: updated analysis of  
1133 cell type-specific signal in epigenomic data. *Bioinformatics*. 2019 jun;.
- 1134 [67] Yu G, Wang LG, He QY. ChIPseeker: an R/Bioconductor package for ChIP peak annotation, comparison and  
1135 visualization. *Bioinformatics*. 2015 mar;31(14):2382–2383.
- 1136 [68] Wang Z, Civelek M, Miller CL, Sheffield NC, Guertin MJ, Zang C. BART: a transcription factor prediction tool  
1137 with query gene sets or epigenomic profiles. *Bioinformatics*. 2018 mar;34(16):2867–2869.

- 1138 [69] Corces MR, Buenrostro JD, Wu B, Greenside PG, Chan SM, Koenig JL, et al. Lineage-specific and single-cell  
1139 chromatin accessibility charts human hematopoiesis and leukemia evolution. *Nature Genetics*. 2016  
1140 aug;48(10):1193–1203.
- 1141 [70] Hansen KD, Irizarry RA, WU Z. Removing technical variability in RNA-seq data using conditional quantile  
1142 normalization. *Biostatistics*. 2012 jan;13(2):204–216.
- 1143 [71] Hinz S, Magheli A, Weikert S, Schulze W, Krause H, Schrader M, et al. Deregulation of EZH2 expression in  
1144 human spermatogenic disorders and testicular germ cell tumors. *World Journal of Urology*. 2009 dec;28(5):631–  
1145 635.
- 1146 [72] Singh R, Fazal Z, Corbet AK, Bikorimana E, Rodriguez JC, Khan EM, et al. Epigenetic Remodeling through  
1147 Downregulation of Polycomb Repressive Complex 2 Mediates Chemotherapy Resistance in Testicular Germ Cell  
1148 Tumors. *Cancers*. 2019 jun;11(6):796.
- 1149 [73] Suva ML, Riggi N, Janiszewska M, Radovanovic I, Provero P, Stehle JC, et al. EZH2 Is Essential for  
1150 Glioblastoma Cancer Stem Cell Maintenance. *Cancer Research*. 2009 nov;69(24):9211–9218.
- 1151 [74] Cheng T, Xu Y. Effects of Enhancer of Zeste Homolog 2 (EZH2) Expression on Brain Glioma Cell  
1152 Proliferation and Tumorigenesis. *Medical Science Monitor*. 2018 oct;24:7249–7255.
- 1153 [75] Farlik M, Halbritter F, MÃ¼ller F, Choudry FA, Ebert P, Klughammer J, et al. DNA Methylation Dynamics of  
1154 Human Hematopoietic Stem Cell Differentiation. *Cell Stem Cell*. 2016 dec;19(6):808–822.
- 1155 [76] Gomez L, Odom GJ, Young JI, Martin ER, Liu L, Chen X, et al. coMethDMR: accurate identification of co-  
1156 methylated and differentially methylated regions in epigenome-wide association studies with continuous  
1157 phenotypes. *Nucleic Acids Research*. 2019 jul;47(17):e98–e98.
- 1158 [77] He H, Sinha I, Fan R, Haldosen LA, Yan F, Zhao C, et al. c-Jun/AP-1 overexpression reprograms ER signaling  
1159 related to tamoxifen response in ER-positive breast cancer. *Oncogene*. 2018 feb;37(19):2586–2600.
- 1160 [78] Miranda TB, Voss TC, Sung MH, Baek S, John S, Hawkins M, et al. Reprogramming the Chromatin  
1161 Landscape: Interplay of the Estrogen and Glucocorticoid Receptors at the Genomic Level. *Cancer Research*. 2013  
1162 jun;73(16):5130–5139.
- 1163 [79] Jaffe AE, Murakami P, Lee H, Leek JT, Fallin MD, Feinberg AP, et al. Bump hunting to identify differentially  
1164 methylated regions in epigenetic epidemiology studies. *International Journal of Epidemiology*. 2012 feb;41(1):200–  
1165 209.
